# Supplementary material for: Massive Gene Transfer and Extensive RNA Editing of a Symbiotic Dinoflagellate Plastid Genome
Source: PubMed Central journal article supplement (PMC4079212; doi:10.1093/gbe/evu109), 2014-05-31
Supplement: supp_evu109_suppFigGBE.pdf [file supp_evu109_suppFigGBE.pdf]

## SUPPLEMENTARY FIGURES

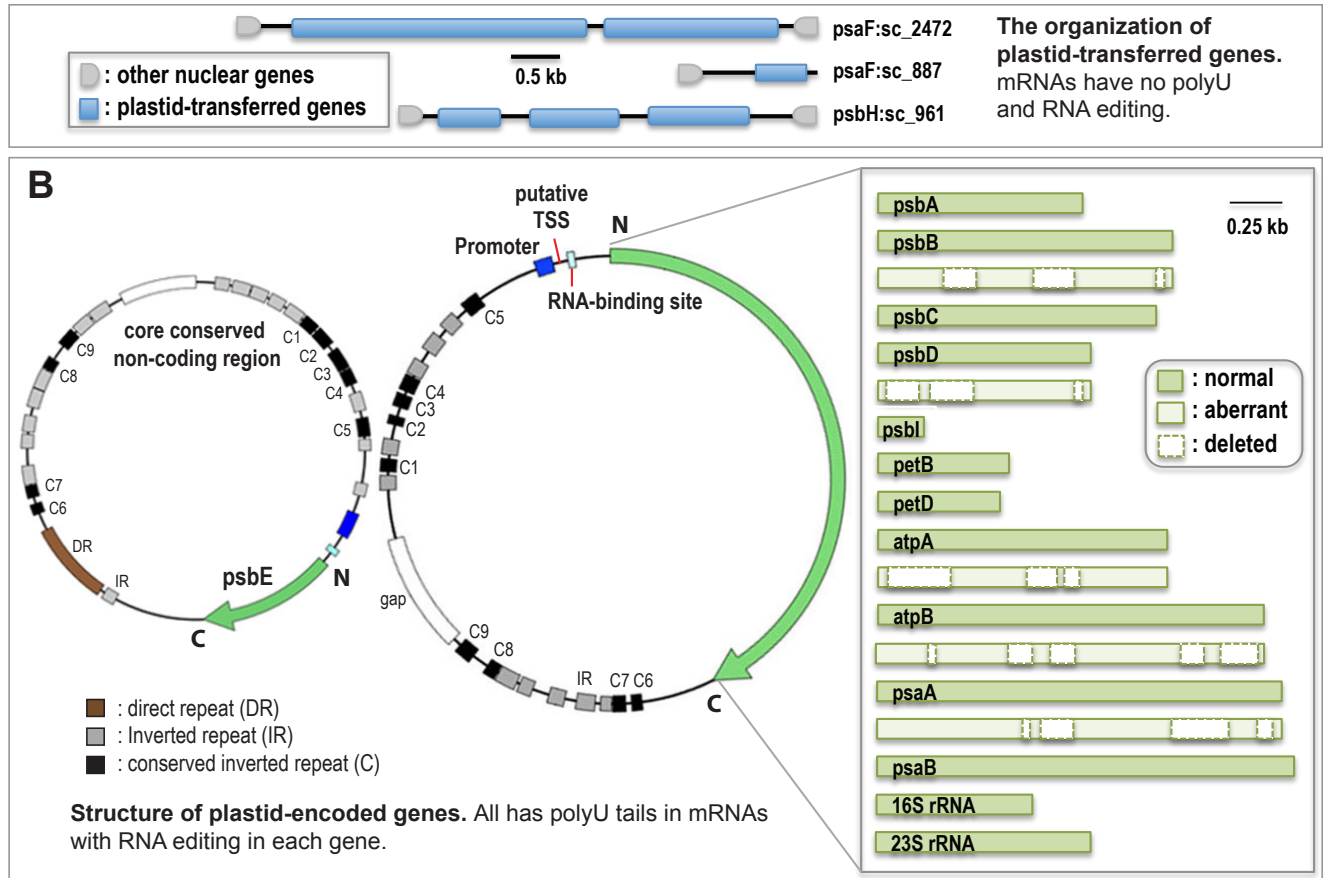

**Supplementary Figure S1: Structure of plastid-transferred genes and plastid-encoded genes (DNA minicircles) of *Symbiodinium minutum*.** (A) Two examples of plastid-transferred genes. Two genes show duplications, often adjacent, on the same scaffold, and only rarely on different scaffolds. (B) Fourteen plastid-encoded genes organized in minicircles. The most common minicircle structure contains a coding region, plus a non-coding region containing a high density of inverted repeats (IR) (gray) and a minimum of nine conserved regions (black). The number of IRs varies from 10-16. In coding regions, aberrant forms were found in *psbB*, *psbD*, *atpA*, *atpB* and *psaA* with 3-5 deletions of ~50-300 bp. The *psbE* minicircle contains a direct repeat (brown) of 35 bp (GCAATCCTGCAGCATAGCATATGCTGCAACCTGCT) in 4 copies. Each repeat is inverted. Therefore, *psbE* has the highest density of IRs (29) observed in *Symbiodinium*. A “GAP box” (white) represents incomplete sequences that were estimated from PCR products. A comparison of (A) and (B) above, demonstrates that nuclear-encoded genes have a completely different structure from plastid-encoded genes.

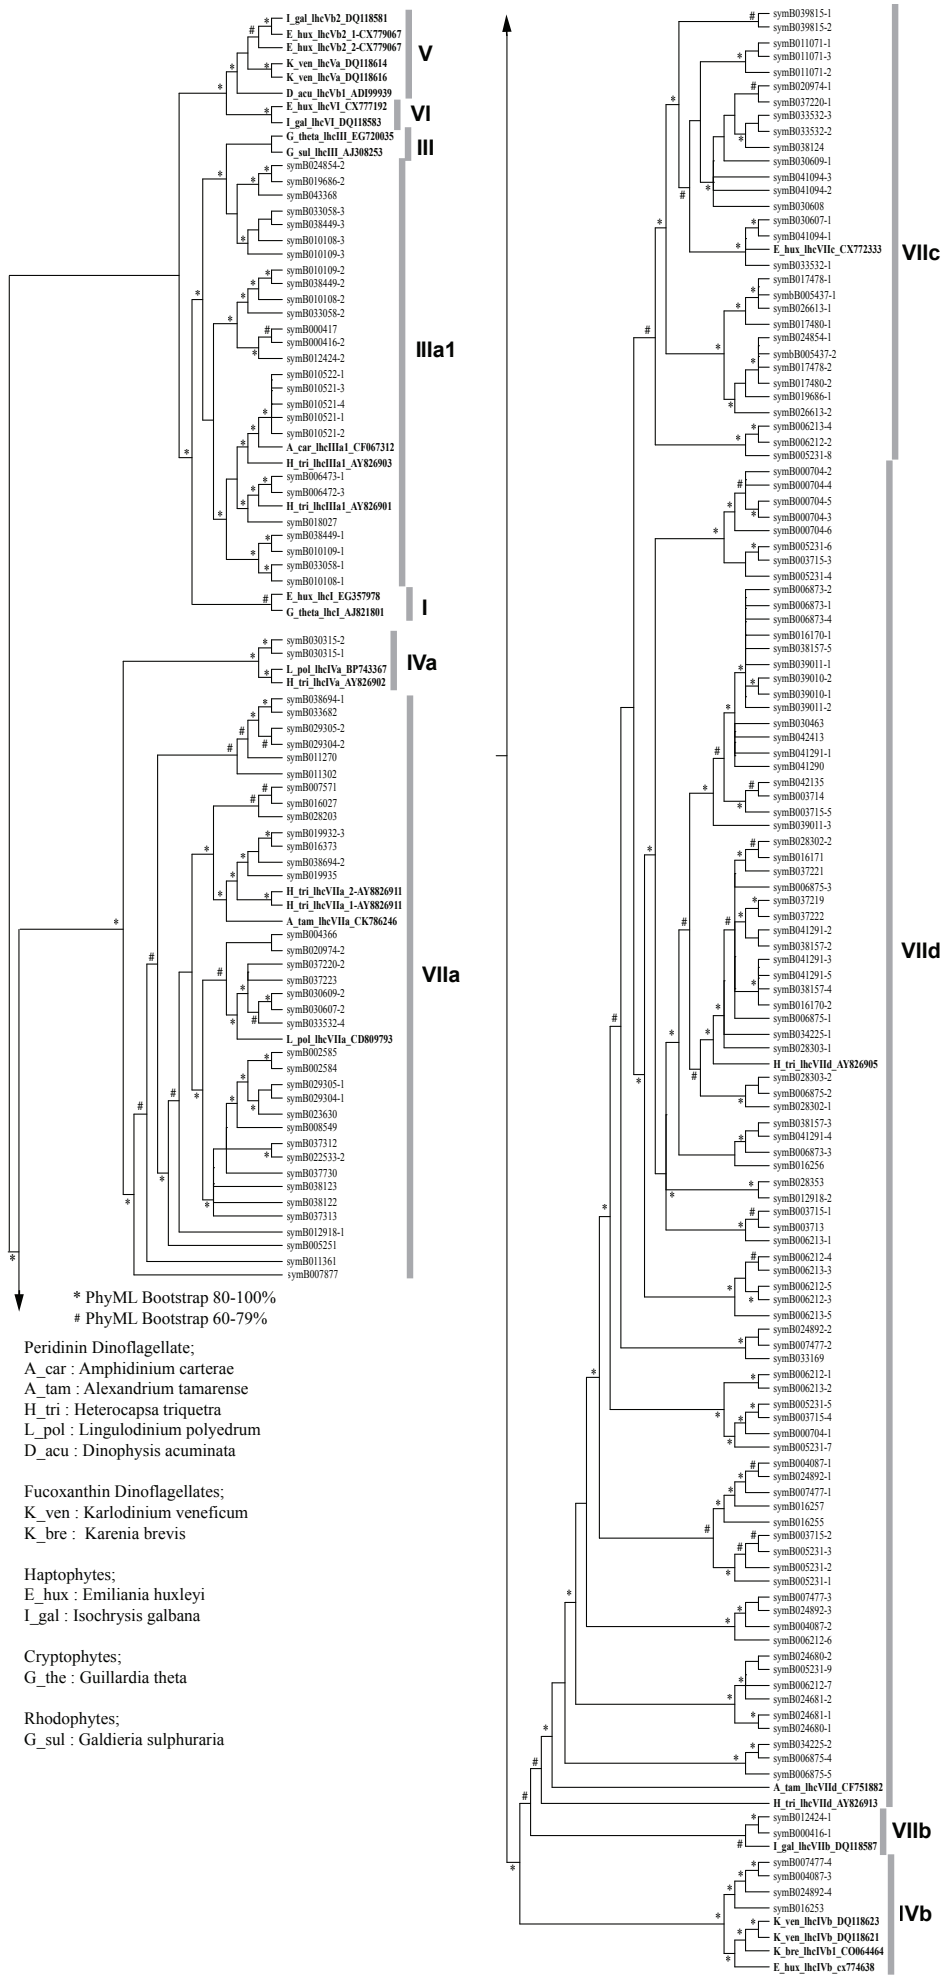

\* PhyML Bootstrap 80-100%  
 # PhyML Bootstrap 60-79%

**Peridinin Dinoflagellate;**

- A\_car : Amphidinium carterae
- A\_tam : Alexandrium tamarene
- H\_tri : Heterocapsa triquetra
- L\_pol : Lingulodinium polyedrum
- D\_acu : Dinophysis acuminata

**Fucoxanthin Dinoflagellates;**

- K\_ven : Karlodinium veneficum
- K\_bre : Karenia brevis

**Haptophytes;**

- E\_hux : Emiliana huxleyi
- I\_gal : Isochrysis galbana

**Cryptophytes;**

- G\_the : Guillardia theta

**Rhodophytes;**

- G\_sul : Galdieria sulphuraria

**Supplementary Figure S2: Phylogenetic tree analysis of light-harvesting complex proteins (LHCs) of *Symbiodinium minutum*.** Maximum likelihood analysis based on amino acid sequences of 101 *lhcb* genes. Polyprotein LHC sequences are treated as separate sequences with specific ID numbers. LHC sequences classified by Hoffman *et al.* (bold) were used as references to define *Symbiodinium* LHCs into subfamilies. By their share number, it can be seen that proteins in subfamily VIIId have undergone extensive duplication in *Symbiodinium*.

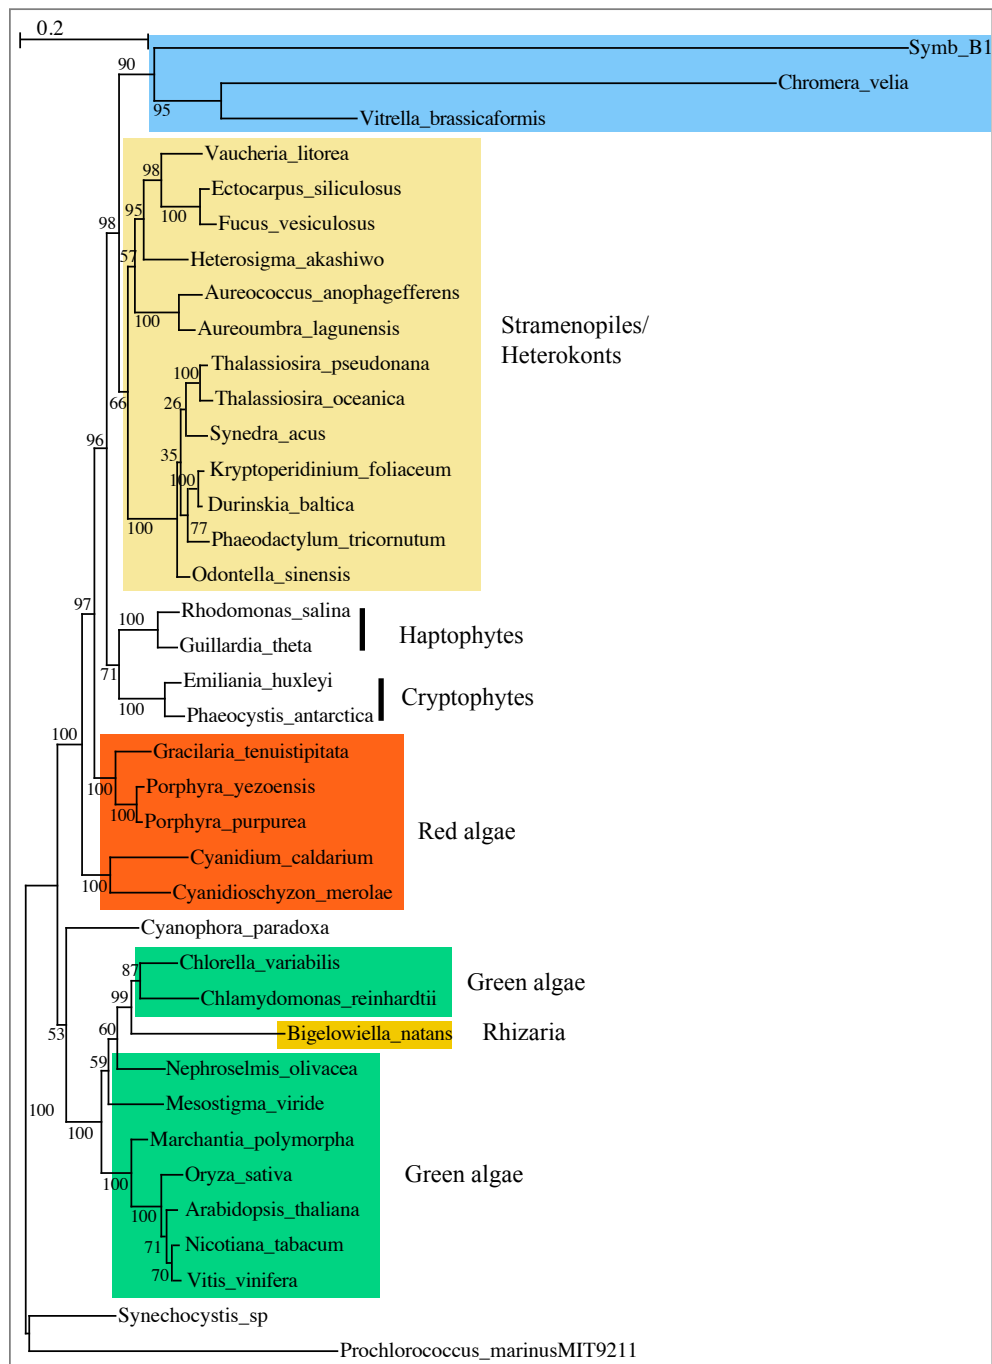

**Supplementary Figure S3: Genome-wide molecular phylogenetics of *Symbiodinium minutum* based on proteins encoded by plastid DNA minicircles.** Maximum-likelihood analysis based on alignment of 3,789 amino acid residues from proteins encoded by 11 core photosystem genes. *psbI* was excluded because it has been lost from the *Chromera* plastid genome. The clade of phylum Chromalveolata/red algae is supported by a 100% bootstrap value, whereas the Group Rhizaria is associated with green algae, forming an independent clade. The scale bar represents 0.2 expected substitutions per site in the aligned regions. The dinoflagellates and apicomplexans (blue) form a clade with the red algae (red) and the stramenopiles (yellow).

Upstream

```

atpB_1      GTACGCATCTCAGGCCTTACGGCCTGAGATGCTTATT-----
petDall1    -----GTCCAGCCCTTACGGCTGGACCA-----
psbA_1      -----GTCCAGCCCTTACGGCTGGACCA-----
psaA_1      -----TTCCAGGCCTTACGGCCTGGAACATGCTTTAACTTGCACCTCAGGACGTAAGT
                *****

atpB_1      -----GTAGCACCTCAGGCCTTACGGCCTGAGGTGTTATATACCAA--CTTT
petDall1    -----GTATACATCTTGGGCTTACAGCCCAAGATGTATGCACCTCAGGCCTTA
psbA_1      -----GTATCACCTCAGGCCTTACGGCCTGAGGTGTATGCATTCAGGCCTTA
psaA_1      CCTGAAGTGCATATCACCTCAGGCCTTACGGCCTGAGGTGTATGCACCTCGGCTTTA
                ** * * * * * * * * * * * * * * * * * * * * * * * * * * * * * * * * *

atpB_1      CTTTTTAAAAAGAAAGTTGTTGTCAAAGA---AAAGTATACGCATCTCAGGCCTTACGGCCT
petDall1    CGGCCTGAAGTGCAA-----AAAGAAAAGAAGTACGCATCTTCAGGCCTTACGGCCT
psbA_1      CGGCCTGAAATGCAA-----AAAGA-AAAAGAAGTACGCATATCAGGCCTTACGGCCT
psaA_1      CAGCCCGAAGTGCAA-----AAAGG-----CAGGCCTTACGGCCT
                * * * * * * * * * * * * * * * * * * * * * * * * * * * * * * * * *

atpB_1      G-----GAATGCTTTTAACTG--GACTCAGGCCTTACGGCCTGAGTC---
petDall1    -----GAAGATGCTTTTAACT--GGTCCAGCCCTTACGGCCTGAGCAGT---
psbA_1      G-----ATATGCTTTTAACT--GGTCCAGCCCTTACGGCCTGAGCAGT---
psaA_1      GCCCGTAGAATAAAAAAGAAAGGCTACATCGAACCCAGCCTTACGGCCTGAGGT
                * * * * * * * * * * * * * * * * * * * * * * * * * * * * * * * * *

atpB_1      -----CAGTATCACCTCAGGCCTTACGGCCTGAGGTG
petDall1    ATACATCTTGGGCTTTACAGCCCAAGATGTATGCATTCGGGCTTACGGCCTGAGCAGT
psbA_1      -----AGTATGCATCTCGGCTTTACAGCCCAAGTGC
psaA_1      -----GCAGTATCACCTCAGCTTTACGGCCTGAGGTG
                * * * * * * * * * * * * * * * * * * * * * * * * * * * * * * * * *

atpB_1      CAAAG-----
petDall1    AAAGAGCCAGGCCTTACGGCCTGGCCGTTGAATCAAAAAGAAATATGCA-ACTGAACCA
psbA_1      AAAGAGCCAGGCCTTACGGCCTGGCCGTTGAACCAAAAAGAAAGTACACTGAACCA
psaA_1      ATATAG-----
                **

atpB_1      -----
petDall1    -----ACAAGTATACTTACTTTCTTTGG--AAAAGAA
psbA_1      GGCCTTACGGCCTGGGTTCAGTATACTATAGTATACCACCTTTCTTTGAAAAAAGA
psaA_1      -----TATACTATACTAACTTTCTTTGG--AAAAGAA
                * * * * *

atpB_1      CTAGTA-----GACCGCATGGTCCAGGACGTAAGTCTCGAACCATGCTTG
petDall1    AAAGTAAGACAAAAAGAAAC-CAACGCATATCTTGGCCGTAAGGCCCAAGATATGCTTC
psbA_1      AAAGTGTGGCAAAAAGAAAACACCGCATCTCTCGGCCGTAAGGCCCAAGGAGATGCTTG
psaA_1      AAAGTTAGTCAAAAAGAAAAA-GACCGCATATACTGGCCGTAAGGCCCAAGTATGCTTG
                * * * * * * * * * * * * * * * * * * * * * * * * * * * * * * * * *

atpB_1      TGCTGCCTACGGCAGCAAAACGAATGAAAGGAATCTTTTC-CTGGTCCAAT-----
petDall1    TGC--CCTTCGG--GCAAAAACAAATGAAATAATCTCTCCTGATGGTGCAAT-----
psbA_1      TGCTGCCTTCCGGCAGCAAAACA-ATAGAAAGATCTCTTCTTGAGACTGATT-----
psaA_1      TGCTGCCTTCCGGCAGCAAAACAGATGAGATAAATGTAACC-TTG-TGGACTTCACAACCA
                * * * * * * * * * * * * * * * * * * * * * * * * * * * * * * * * *

atpB_1      -----CAGGTC-ACAAACCAA-TGAAATCA-GGTGTGCGCATG-AGCCAAAATAACA
petDall1    -----CCACTTAG-----
psbA_1      -----TCAGTTCACAACATGCAGCAAAATATGCAGCCAAAAT--CA
psaA_1      ATTCACCTCAGGTG-GTTTACCACCCTGAAATAT-GCAGCAATTCAG-GGCTGGCAAAAC
                *

atpB_1      TTTTGGCGTGAAGTGAAGTGTTCCTCTGCAAAAATACGGTTAGTGTCCAGCCCAAAAT-
petDall1    --TTCGGCTGAAGTGAACACACTTCCATTGCGATTTTACGGTTAGCCCTCCAGCCCAAAATC
psbA_1      TTTTGGCGTGAAGTGAAGATCGCTCTCAAAATTTACGGTTAACCTCAGCTGAAAT-
psaA_1      TTTTGGCGTGAACACCGGACTTTCATTGAGATTTTACGGTTAGCCCTCAGGCCCAAAATC
                * * * * * * * * * * * * * * * * * * * * * * * * * * * * * * * * *

```

Downstream

```

atpB_2      ---TCTGGTGGTCCACCACCAAGTTCATCTTCTTATGTTTGCTGGCCGAAGGCCAG
psbA_1      GCAATCTGGTGGTCCACTCAGAAAGATGACCTTCATATGTTTGCTGGCCGAAGGCCAG
petB_1      AGCAGCAGGTGGTACACCTAGAATCA--CTCATTATGTTTGCTGGCCGAAGGCCAG
atpA_1      GTCATCAGGTGGTCCACCAATAAATACCTCATATGTTTGCTGGCCGAAGGCCAG
                * : * * * * * * * * * * * * * * * * * * * * * * * * * * * * * * * * *

atpB_2      CAGTAGACAGCAAATATGTGCTAGCAGCATATAGCAGCAGGTTGCACACCTGCTGCTA
psbA_1      CAGTACACAGCAATATGTGCTAGCAGCATATTAGCAGCAGGTTGCACACCTGCTGCTA
petB_1      CAGTAGACAGCAAATATGTGCTAGCAGCATATTTTGCTGCATTTGCTAGGCCAATGCAG
atpA_1      CAGTACACAGCAATATGTGCTAGCAGCATATTTTGCTGCATTTGCTAGGCCAATGCAG
                * * * * * * * * * * * * * * * * * * * * * * * * * * * * * * * * *

atpB_2      TTTTGTGCATTGGCGTAG-----CCAATGCAGCACAAAAAGAAATTGAAGCTCTGCA
psbA_1      TTTTGTGCATCACAACCGAAGGTTGTGATGCAGCACAAAAGAAAGATAAATAGCTGCA
petB_1      CATAGCAGCAGGTTATCTCTGCTGCTATTTACTGCACAAAAAATA---GAGCTCTGCA
atpA_1      CATAGCAGCAGGTTATCTGATGCTATTTTTGCTGCATTGCTAGGCCAATGCAG
                : * : * * * * * * * * * * * * * * * * * * * * * * * * * * * * * *

atpB_2      CCACAACCTAGGT--TGTGGTGCAGTTTGCTGCATTGGCTAGGCCAATGCAGCATTC
psbA_1      CCACAACCTGGCT--TGTGGTGCAGCATGTTTGCAC-----TTC
petB_1      TCTCAGCAGTAGTCTCGATGAGTGCAGTTTGCAGCATGGCTAGGCCAATGCCTATTC
atpA_1      TCAACAACCGAAGT--TGTGATGCAG-----CAGTTGCACAAAAGAAAGCTCTCAC
                * * * * * * * * * * * * * * * * * * * * * * * * * * * * * * * * *

atpB_2      CATTGCGAATTCCAATGCACCACAACGGAGTTGTGTCATTGTTGTGAGATCTGCAGGT
psbA_1      CATTGCGAATTCCAATGCACCACAACGGAGTTGTGTCATTGTTGTGAGATCTGCAGGT
petB_1      CATTGCGAATTCCAATGCACCACAACGGAGTTGTGTCATTGTTGTGAGATCTGCAGGT
atpA_1      CACAACCGAAGTTGTGTTATTGCGAATTGCTGCATTGCTAGGCCAATGCAGCA
                * * : * * * * * : * * * * * : * * * * * * * * * * * * * * * * * * * * *

atpB_2      GAAAGCTGCAGATCTCAAA--GTTAGGTGCTTGCACCTAACCGTAAATTCGCAATGGAA
psbA_1      GAAAGCTGCAGATCTCAAAGGTTAGGTGCTTGCACCTAACCGTAAATTCGCAATGGAA
petB_1      GAAAGCTGCAGATCTCAAA--GTTAGGTGCTTGCACCTAACCGTAAATTCGCAATGGAA
atpA_1      GAAAGCTGCAGATCTCAAA--GTTAGGTGCTTGCACCTAACCGTAAATTCGCAATGGAA
                * * * * * * * * * * * * * * * * * * * * * * * * * * * * * * * * *

atpB_2      ACTCTTCACTTTCAGCCAAAACGTGTTTGGCGTGAAAACCGTGTGAAATCCAGCCT
psbA_1      ACTCTTCACTTTCAGCCAAAACGTGTTTGGCGTGAAAACCGTGTGAAATCC-----
petB_1      ACTCTTCACTTTCAGCCAAAACGTGTTTGGCGTGAAAACCGTGTGAAATCC-----
atpA_1      ACTCTTCACTTTCAGCCAAAACGTGTTTGGCGTGAAAACCGTGTGAAATCC-----
                * * * * * * * * * * * * * * * * * * * * * * * * * * * * * * * * *

```

**Supplementary Figure S4: Alignment of non-coding sequences of *Symbiodinium minutum* minicircles.** Since the sequence of the non-coding region was incomplete, the upstream sequence beyond the start codon and the downstream sequence after the stop codon were used for the alignment. Inverted repeats (IRs) contain conserved regions (blue) and variable regions (yellow). Conserved regions are embedded in variable regions, which contain insertions and deletions. These variable regions also contain many IRs. Bold bases are intra-IR spacers. The number of IRs varies in the variable region. A region of high AT-content (green), is surrounded by an IR region. All *Symbiodinium* minicircles contain large numbers of IRs, the function of which is presently unknown. However, it has been suggested that the region bracketed by these sequences may contain the origin of replication.

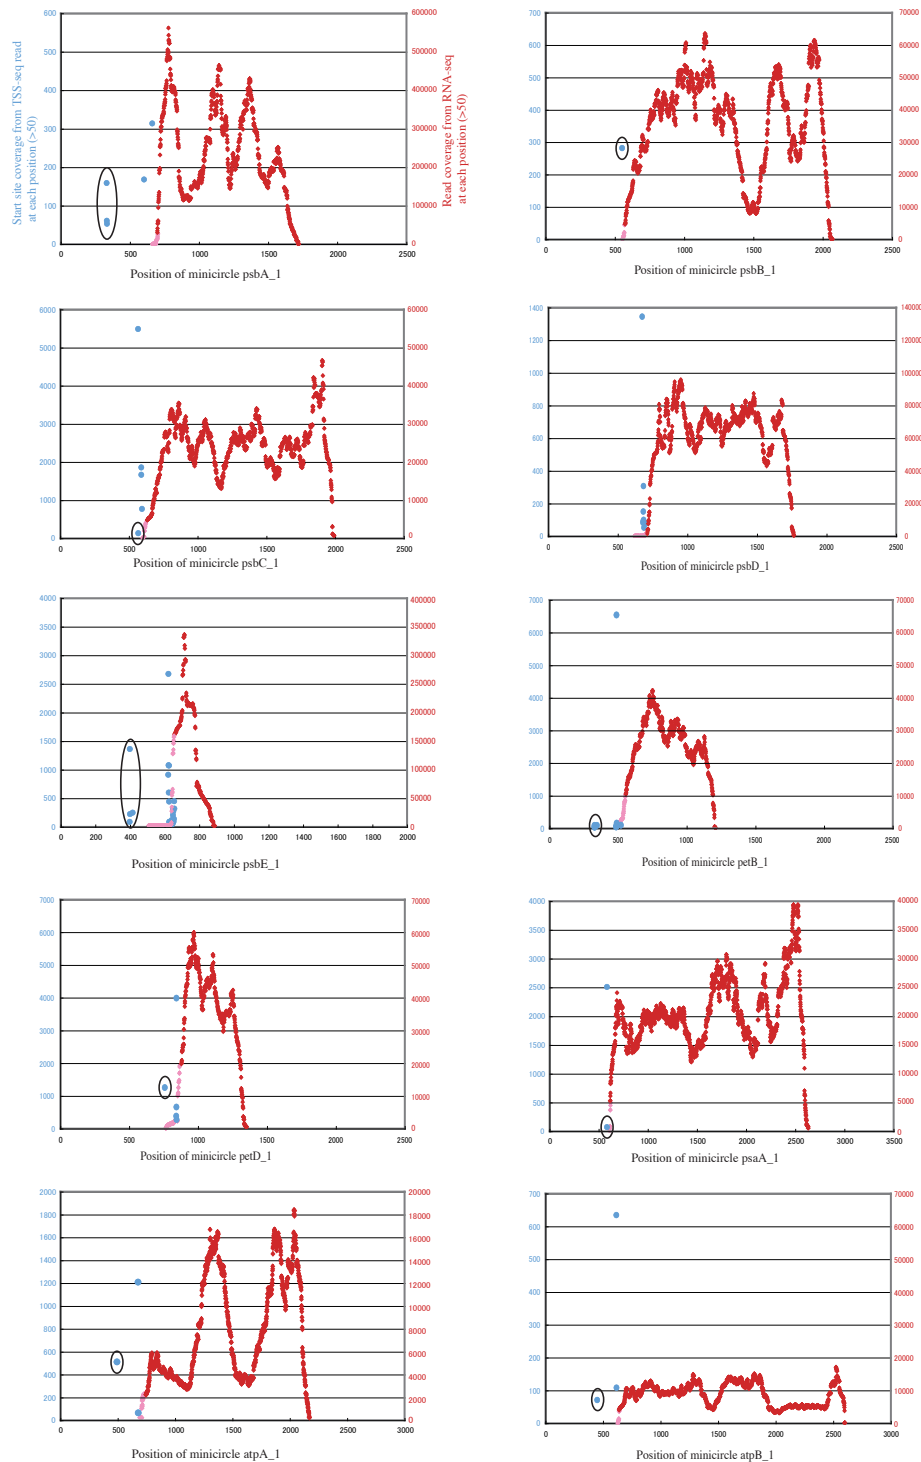

**Supplementary Figure S5: TSS analysis of protein-coding genes of *Symbiodinium minutum* DNA minicircles.** Blue dots show start site coverage (left Y axis) of reads from the TSS-library. Start site coverage of ORFs is omitted. In contrast, pink dots on UTRs and red dots on ORFs indicate read coverage (right Y axis) from RNA-seq without enzyme treatments. Most 5' dots removed from ORFs are surrounded by black line, corresponding to putative TSS sites (fig. 2). For psbD-containing minicircle, RNA-seq reads without enzyme treatments are mapped on most 5' region for that upstream of ORF.

**A**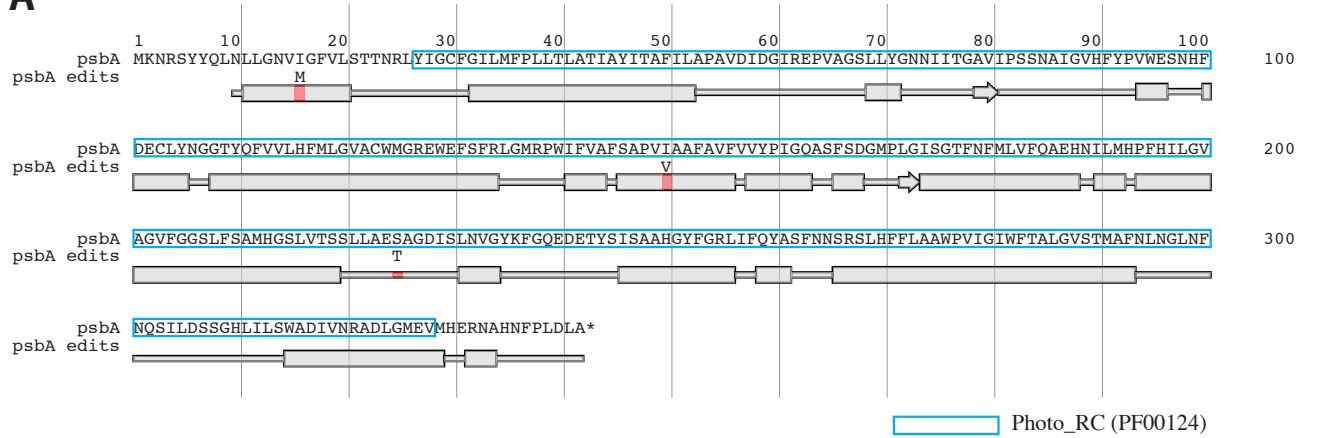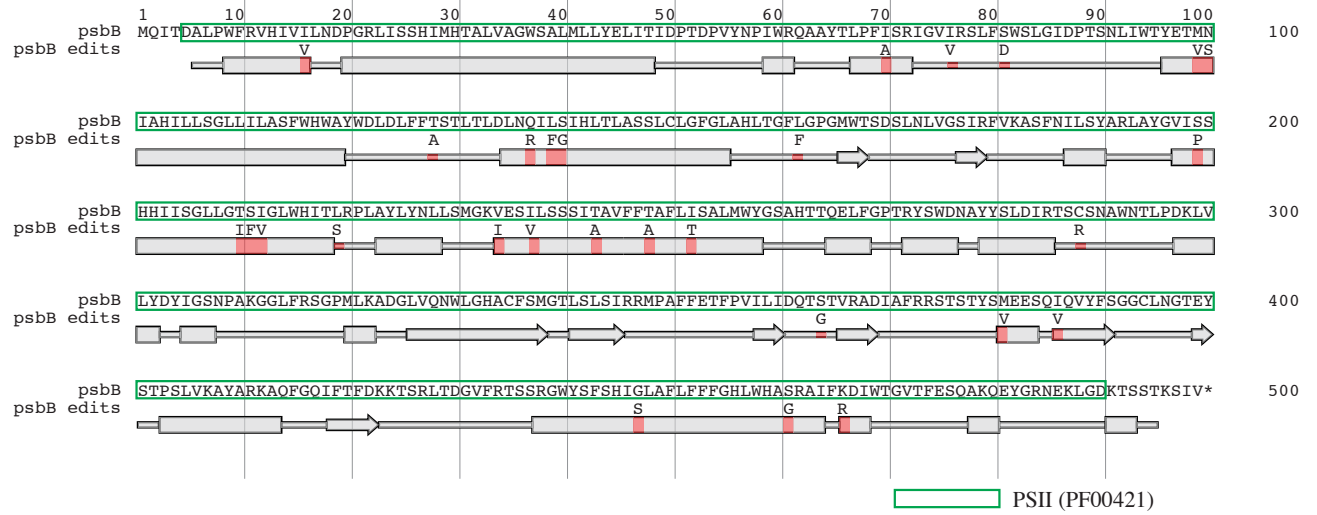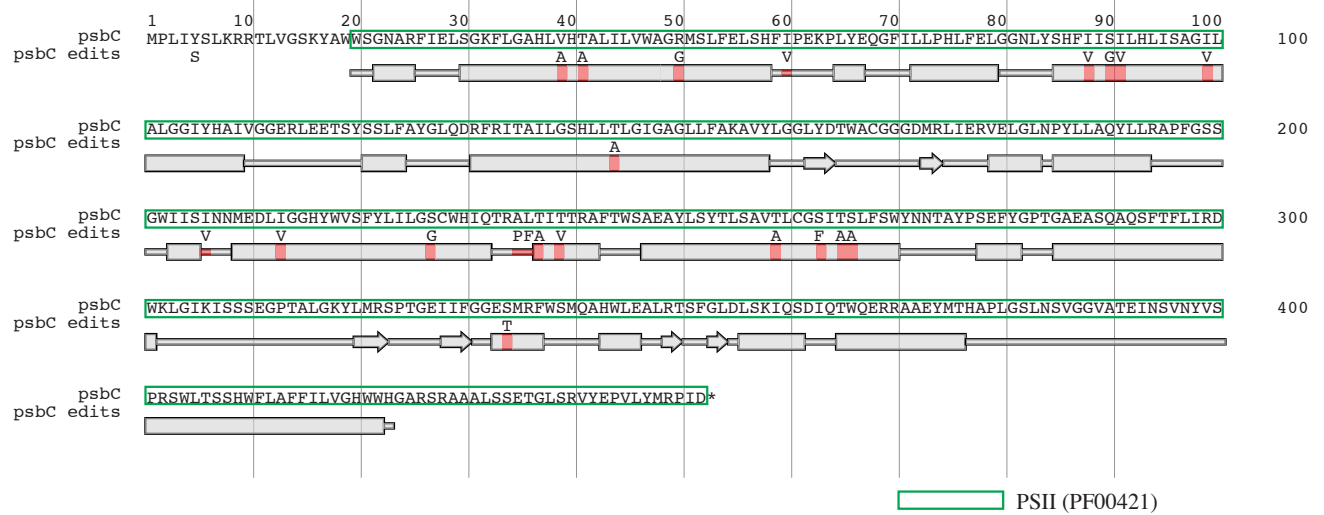

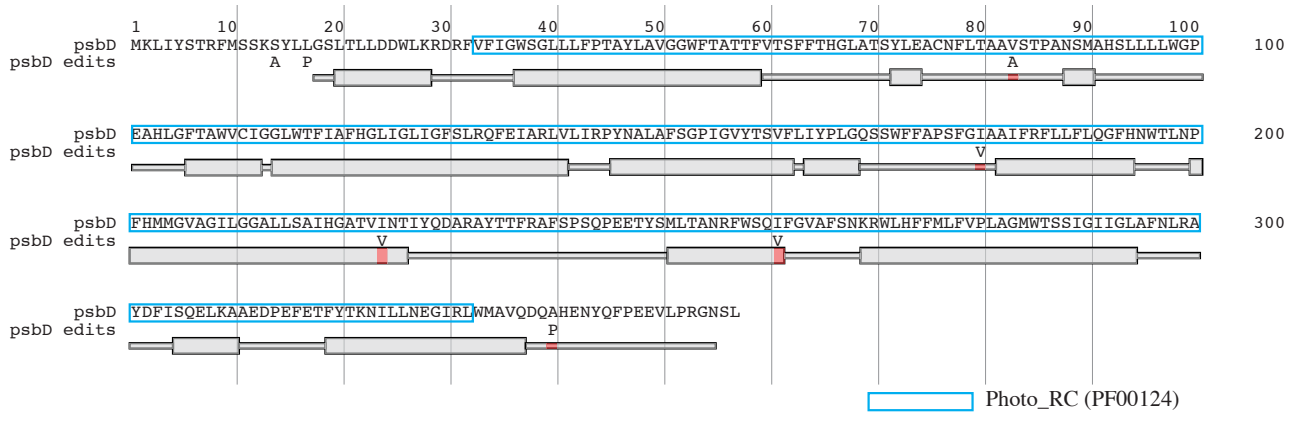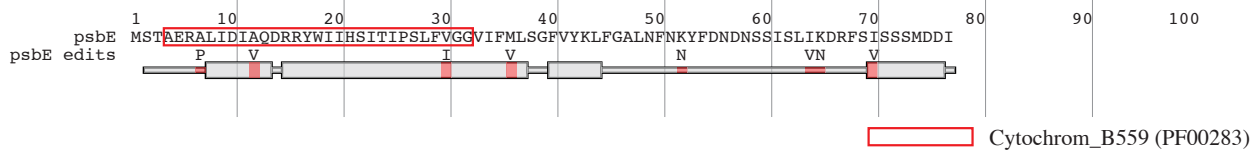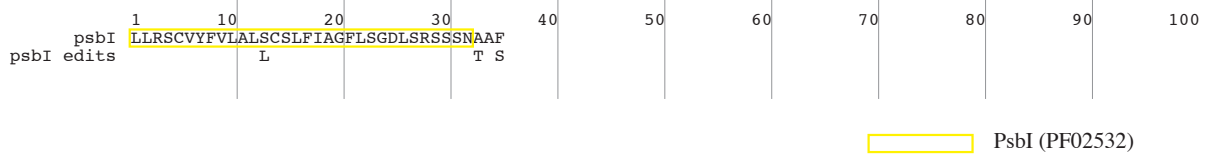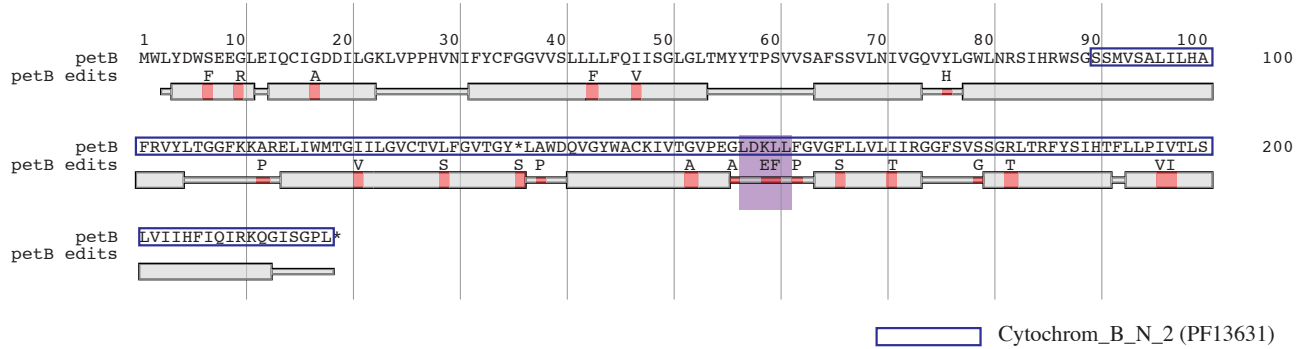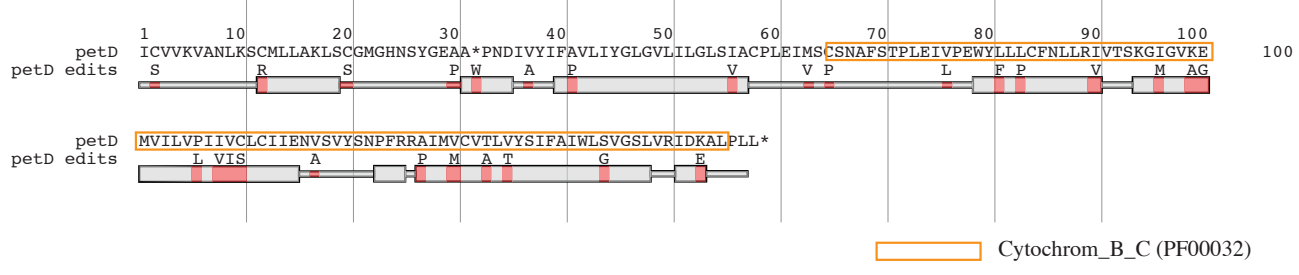





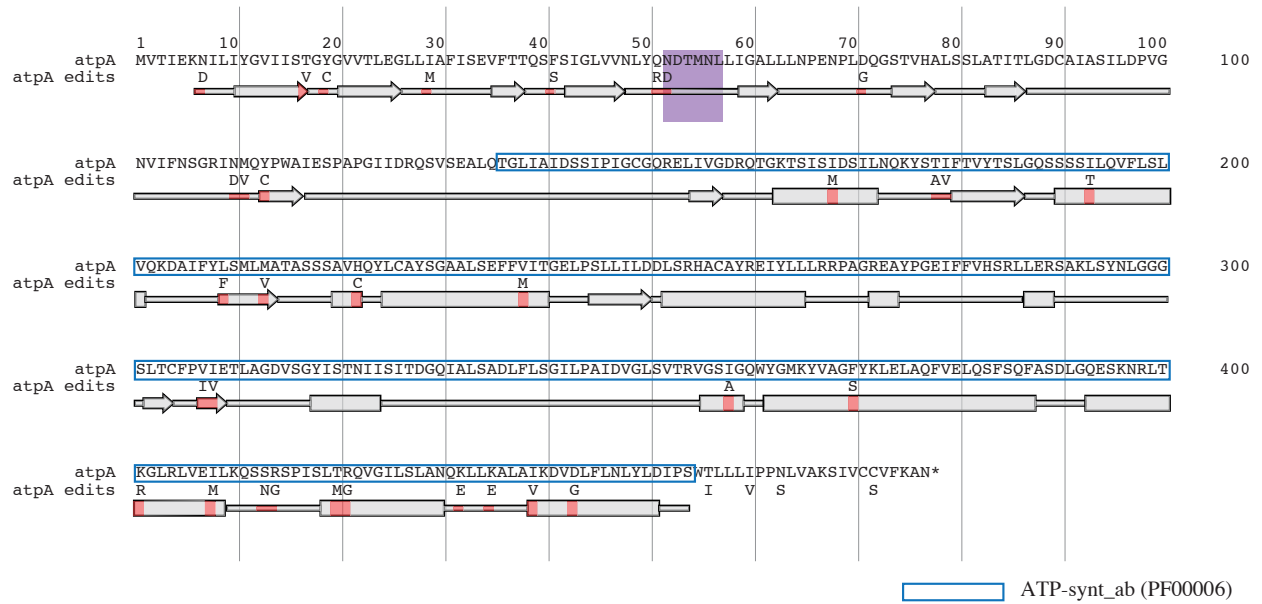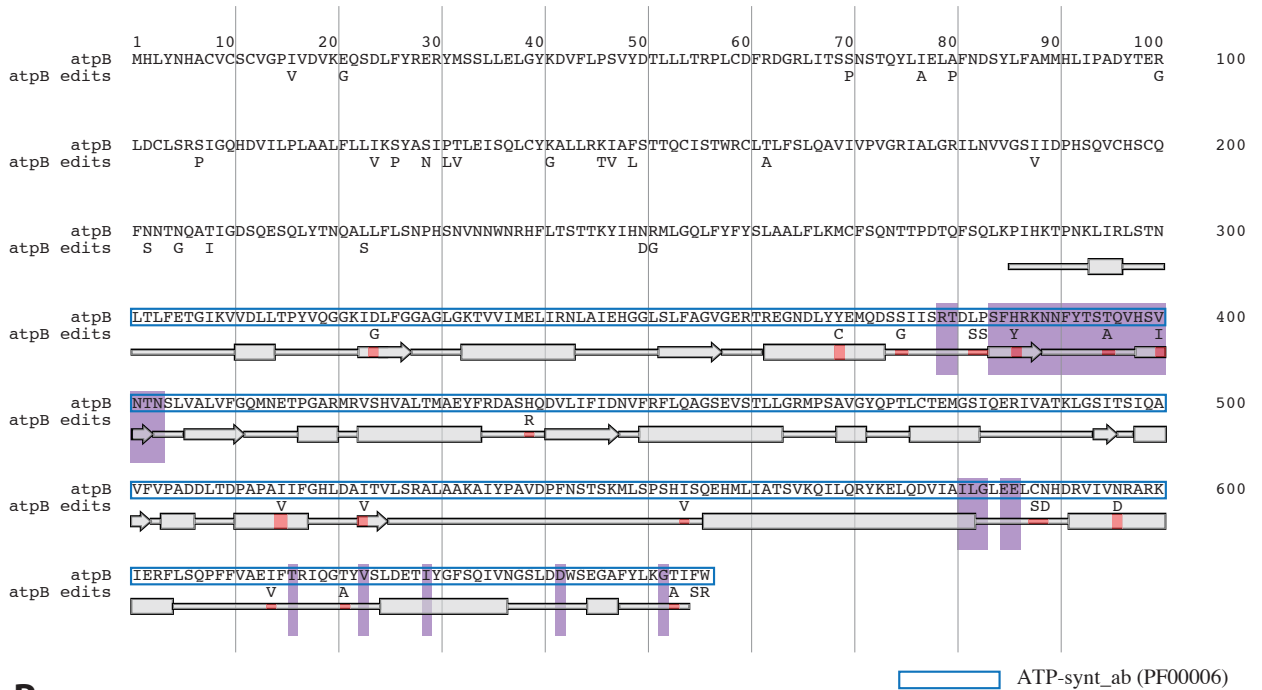

**B**

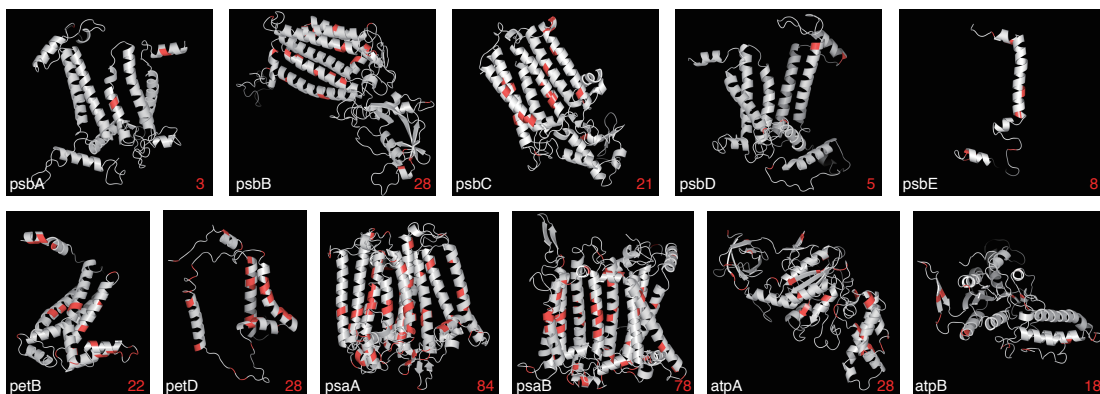

**Supplementary Figure S6: Distribution of amino acid residues converted by RNA editing in plastid-encoded genes of *Symbiodinium minutum* and predicted secondary structures. (A)** Lower case letters show edited amino acid residues. Conserved structures found by a pfam domain search are colored. Predicted secondary structures, helix (gray boxes),  $\beta$ -sheet (arrow boxes) and others (lines) are shown. Edited sites are marked in red. Regions showing significant conformational changes are highlighted in purple. **(B)** Secondary structures of plastid-encoded genes are also shown in 3D models. Residue numbers of amino acids converted by RNA editing are shown in red.
