# Supplementary material for: Massive Gene Transfer and Extensive RNA Editing of a Symbiotic Dinoflagellate Plastid Genome
Source: PubMed Central journal article supplement (PMC4079212; doi:10.1093/gbe/evu109), 2014-05-31
Supplement: supp_evu109_supplTable.pdf [file supp_evu109_supplTable.pdf]

**Table S1. List of plastid-associated genes including plastid-encoded, plastid-transferred and nuclear-transferred genes in *Symbiodinium minutum*.**

| Gene                  | No. after gene name | Gene model ID     | Intron type |       |       | Transcriptome ID                                                                                                           | scaffold   | PFAM domain              | KEGG ID |
|-----------------------|---------------------|-------------------|-------------|-------|-------|----------------------------------------------------------------------------------------------------------------------------|------------|--------------------------|---------|
|                       |                     |                   | GT-AG       | GC-AG | GA-AG |                                                                                                                            |            |                          |         |
| <b>Photosystem II</b> |                     |                   |             |       |       |                                                                                                                            |            |                          |         |
| <i>psbA</i>           |                     | JX094319-20       |             |       |       | symbB1.comp0_c0_seq1, mfl105_rep_c1243                                                                                     | minicircle |                          | K02703  |
| <i>psbB</i>           |                     | JX094321-4        |             |       |       | symbB1.comp28_c0_seq1, mfl105_rep_c448                                                                                     | minicircle |                          | K02704  |
| <i>psbC</i>           |                     | JX094325-6        |             |       |       | symbB1.comp52_c0_seq1, mfl105_rep_c1265                                                                                    | minicircle |                          | K02705  |
| <i>psbD</i>           |                     | JX094327          |             |       |       | symbB1.comp12_c0_seq1, mfl105_rep_c2000                                                                                    | minicircle |                          | K02706  |
| <i>psbE</i>           |                     | JX094328-9        |             |       |       | symbB1.comp2_c0_seq1, mfl105_rep_c2000                                                                                     | minicircle |                          | K02707  |
| <i>psbF</i>           | 1                   | symbB.v1.2.037381 | 1           | 1     | 0     | symbB1.EST_k37c20_49605                                                                                                    | 5492       | Cytochrom_B559 (PF00283) | K02708  |
|                       | 2                   | symbB.v1.2.006949 | 7           | 4     | 1     | symbB1.EST_k37c20_8605                                                                                                     | 416        | Cytochrom_B559 (PF00283) | K02708  |
|                       | 3                   | symbB.v1.2.006950 | 3           | 4     | 1     | symbB1.EST_k37c20_62297                                                                                                    | 416        | Cytochrom_B559 (PF00283) | K02708  |
|                       | 4                   | symbB.v1.2.006948 | 4           | 4     | 0     | symbB1.EST_k37c20_11166                                                                                                    | 416        | Cytochrom_B559 (PF00283) | K02708  |
| <i>psbH</i>           | 1                   | symbB.v1.2.035656 | 1           | 0     | 0     | symbB1.EST_k37c20_14174                                                                                                    | 4856       | PsbH (PF00737)           | K02709  |
|                       | 2                   | symbB.v1.2.040833 | 0           | 0     | 0     | symbB1.EST_k37c20_48001                                                                                                    | 7576       | PsbH (PF00737)           | K02709  |
|                       | 3                   | symbB.v1.2.013536 | 0           | 0     | 0     | symbB1.EST_k37c20_7749                                                                                                     | 961        | PsbH (PF00737)           | K02709  |
|                       | 4                   | symbB.v1.2.013535 | 22          | 15    | 3     | symbB1.EST_k37c20_45878                                                                                                    | 961        | PsbH (PF00737)           | K02709  |
|                       | 5                   | symbB.v1.2.013537 | 1           | 0     | 0     | symbB1.EST_k37c20_45787                                                                                                    | 961        | PsbH (PF00737)           | K02709  |
|                       | 6                   | symbB.v1.2.013538 | 0           | 0     | 0     | symbB1.EST_k37c20_61337                                                                                                    | 961        | PsbH (PF00737)           | K02709  |
| <i>psbI</i>           |                     | JX094330          |             |       |       | symbB1.comp1832_c0_seq1, mfl105_c31159                                                                                     | minicircle |                          | K02710  |
| <i>psbJ</i>           | 1                   | symbB.v1.2.006330 | 2           | 0     | 0     | symbB1.EST_k37c20_22776                                                                                                    | 378        | PsbJ (PF01788)           |         |
|                       | 2                   | symbB.v1.2.006331 | 0           | 0     | 0     | –                                                                                                                          | 378        | PsbJ (PF01788)           |         |
|                       | 3                   | symbB.v1.2.006332 | 14          | 9     | 5     | symbB1.EST_k37c20_3665                                                                                                     | 378        | PsbJ (PF01788)           |         |
| <i>psbK</i>           |                     | symbB.v1.2.040276 | 1           | 3     | 1     | symbB1.EST_k37c20_12465                                                                                                    | 7118       | PsbK (PF02533)           |         |
| <i>psbL</i>           | 1                   | symbB.v1.2.022100 | 8           | 5     | 2     | symbB1.EST_k37c20_28278                                                                                                    | 1946       | PsbL (PF02419)           | K02713  |
|                       | 2                   | symbB.v1.2.034326 | 3           | 4     | 0     | symbB1.EST_k37c20_15479                                                                                                    | 4412       | PsbL (PF02419)           | K02713  |
|                       | 3                   | symbB.v1.2.034330 | 1           | 3     | 1     | –                                                                                                                          | 4412       | PsbL (PF02419)           | K02713  |
|                       | 4                   | symbB.v1.2.034328 | 4           | 5     | 0     | –                                                                                                                          | 4412       | PsbL (PF02419)           | K02713  |
| <i>psbM</i>           | 1                   | symbB.v1.2.011175 | 0           | 0     | 0     | symbB1.EST_k37c20_19295                                                                                                    | 744        | PsbM (PF05151)           | K02714  |
|                       | 2                   | symbB.v1.2.011176 | 0           | 0     | 0     | –                                                                                                                          | 744        | PsbM (PF05151)           |         |
|                       | 3                   | symbB.v1.2.011177 | 0           | 0     | 0     | symbB1.EST_k37c20_19294                                                                                                    | 744        | PsbM (PF05151)           |         |
|                       | 4                   | symbB.v1.2.011174 | 0           | 0     | 0     | symbB1.EST_k37c20_19291                                                                                                    | 744        | PsbM (PF05151)           |         |
|                       | 5                   | symbB.v1.2.011173 | 0           | 0     | 0     | –                                                                                                                          | 744        | PsbM (PF05151)           |         |
|                       | 6                   | symbB.v1.2.039824 | 3           | 2     | 1     | symbB1.EST_k37c20_59508                                                                                                    | 6809       | PsbM (PF05151)           |         |
| <i>psbN</i>           |                     | symbB.v1.2.007196 | 11          | 15    | 1     | symbB1.comp703_c0_seq1                                                                                                     | 436        | PsbN (PF02468)           | K02715  |
| <i>psbO</i>           | 1                   | symbB.v1.2.023718 | 1           | 0     | 1     | –                                                                                                                          | 2193       | MSP (PF01716)            | K02716  |
|                       | 2                   | symbB.v1.2.013486 | 28          | 20    | 5     | symbB1.EST_k37c20_5108, symbB1.EST_k37c20_10154, symbB1.EST_k37c20_2548, symbB1.EST_k37c20_2545                            | 957        | MSP (PF01716)            |         |
|                       | 3                   | symbB.v1.2.023720 | 6           | 4     | 3     | symbB1.EST_k37c20_43477, symbB1.EST_k37c20_43479, symbB1.EST_k37c20_56226, symbB1.EST_k37c20_2546, symbB1.EST_k37c20_43478 | 2193       | MSP (PF01716)            |         |
| <i>psbP</i>           | 1                   | symbB.v1.2.031030 | 15          | 10    | 1     | symbB1.EST_k37c20_14625                                                                                                    | 3559       | PsbP (PF01789)           | K02717  |
|                       | 2                   | symbB.v1.2.013147 | 8           | 13    | 1     | symbB1.EST_k37c20_7108, symbB1.EST_k37c20_44209                                                                            | 925        | PsbP (PF01789)           |         |
| <i>psbQ</i>           |                     | –                 |             |       |       | –                                                                                                                          |            | PsbQ (PF05757)           |         |

|                    |    |                   |    |    |    |                                                                                    |      |                                                                                      |        |
|--------------------|----|-------------------|----|----|----|------------------------------------------------------------------------------------|------|--------------------------------------------------------------------------------------|--------|
| <i>psbR</i>        | –  | –                 | –  | –  | –  | –                                                                                  | –    | PsbR (PF04725)                                                                       |        |
| <i>psbS</i>        | –  | –                 | –  | –  | –  | –                                                                                  | –    | –                                                                                    |        |
| <i>psbTc</i>       | –  | –                 | –  | –  | –  | –                                                                                  | –    | PsbT (PF01405)                                                                       |        |
| <i>psbTn</i>       | –  | –                 | –  | –  | –  | –                                                                                  | –    | –                                                                                    |        |
| <i>psbU</i>        | 1  | symbB.v1.2.032533 | 9  | 6  | 7  | symbB1.EST_k37c20_28312                                                            | 3918 | PsbU (PF06514),<br>Myb_DNA-bind_6<br>(PF13921)                                       | K02719 |
|                    | 2  | symbB.v1.2.032534 | 2  | 0  | 0  | symbB1.EST_k37c20_1039                                                             | 3918 | PsbU (PF06514),<br>PsbU (PF06514),<br>PsbU (PF06514)                                 |        |
| <i>psbV</i>        | 1  | symbB.v1.2.040053 | 2  | 0  | 1  | symbB1.EST_k37c20_62309                                                            | 6958 | Cytochrom_C<br>(PF00034)                                                             | K02720 |
|                    | 2  | symbB.v1.2.041562 | 2  | 0  | 1  | symbB1.EST_k37c20_55685                                                            | 8355 | Cytochrom_C<br>(PF00034)                                                             |        |
|                    | 3  | symbB.v1.2.041561 | 1  | 0  | 0  | –                                                                                  | 8355 | Cytochrom_C<br>(PF00034)                                                             |        |
|                    | 4  | symbB.v1.2.040054 | 2  | 0  | 1  | symbB1.EST_k37c20_48299                                                            | 6958 | Cytochrome_CBB3<br>(PF13442)                                                         |        |
| <i>psbW</i>        | –  | –                 | –  | –  | –  | –                                                                                  | –    | PsbW (PF07123)                                                                       | K08903 |
| <i>psbX</i>        | –  | –                 | –  | –  | –  | –                                                                                  | –    | PsbX (PF06596)                                                                       |        |
| <i>psbY</i>        | 1  | symbB.v1.2.029162 | 1  | 0  | 0  | symbB1.EST_k37c20_471                                                              | 3163 | PsbY (PF06298)                                                                       | K02723 |
|                    | 2  | symbB.v1.2.034824 | 3  | 3  | 0  | symbB1.EST_k37c20_8760                                                             | 456  | PsbY (PF06298)                                                                       |        |
|                    | 3  | symbB.v1.2.038177 | 3  | 1  | 0  | symbB1.EST_k37c20_19997                                                            | 5861 | PsbY (PF06298)                                                                       |        |
| <i>psbZ</i>        | –  | –                 | –  | –  | –  | –                                                                                  | –    | Ycf9 (PF01737)                                                                       | K02724 |
| <i>psb27</i>       | –  | symbB.v1.2.001675 | 1  | 10 | 1  | symbB1.EST_k37c20_10935                                                            | 86   | PSII_Pbs27<br>(PF13326)                                                              | K08902 |
| <i>psb28</i>       | –  | –                 | –  | –  | –  | –                                                                                  | –    | Psb28 (PF03912)                                                                      |        |
| <i>psb29</i>       | –  | symbB.v1.2.025262 | 7  | 12 | 1  | symbB1.EST_k37c20_6259                                                             | 2444 | ThylakoidFormat<br>(PF11264)                                                         |        |
| <i>psb30/ycf12</i> | –  | symbB.v1.2.019436 | 0  | 0  | 0  | symbB1.EST_k37c20_11334                                                            | 1590 | PSII_Ycf12<br>(PF05969)                                                              |        |
| <i>psb31</i>       | –  | –                 | –  | –  | –  | –                                                                                  | –    | –                                                                                    |        |
| <i>lhcb</i>        | 1  | symbB.v1.2.000416 | 8  | 7  | 8  | symbB1.comp258_c0_seq2                                                             | 30   | Chloroa_b-bind<br>(PF00504)                                                          |        |
|                    | 2  | symbB.v1.2.000417 | 8  | 7  | 9  | symbB1.EST_k37c20_6890                                                             | 30   | Chloroa_b-bind<br>(PF00504)                                                          |        |
|                    | 3  | symbB.v1.2.000704 | 10 | 10 | 3  | symbB1.EST_k37c20_1429                                                             | 40   | Chloroa_b-bind<br>(PF00504)                                                          |        |
|                    | 4  | symbB.v1.2.002584 | 1  | 0  | 0  | symbB1.EST_k37c20_19074                                                            | 135  | Chloroa_b-bind<br>(PF00504)                                                          |        |
|                    | 5  | symbB.v1.2.002585 | 8  | 0  | 1  | symbB1.EST_k37c20_17230                                                            | 135  | Chloroa_b-bind<br>(PF00504)                                                          |        |
|                    | 6  | symbB.v1.2.003713 | 13 | 8  | 6  | symbB1.comp15162_c0_seq1,<br>symbB1.comp23584_c0_seq1,<br>symbB1.comp16437_c0_seq1 | 209  | Chloroa_b-bind<br>(PF00504)                                                          |        |
|                    | 7  | symbB.v1.2.003714 | 1  | 2  | 0  | symbB1.EST_k37c20_11015                                                            | 209  | Chloroa_b-bind<br>(PF00504)                                                          |        |
|                    | 8  | symbB.v1.2.003715 | 33 | 11 | 10 | symbB1.EST_k37c20_11024,<br>symbB1.EST_k37c20_11028                                | 209  | Chloroa_b-bind<br>(PF00504)                                                          |        |
|                    | 9  | symbB.v1.2.004087 | 10 | 11 | 2  | symbB1.EST_k37c20_21946                                                            | 200  | Chloroa_b-bind<br>(PF00504)                                                          |        |
|                    | 10 | symbB.v1.2.004366 | 7  | 8  | 2  | symbB1.EST_k37c20_2750                                                             | 240  | Chloroa_b-bind<br>(PF00504)                                                          |        |
|                    | 11 | symbB.v1.2.005126 | 6  | 6  | 1  | symbB1.EST_k37c20_1821,<br>symbB1.EST_k37c20_1820                                  | 226  | Chloroa_b-bind<br>(PF00504), MIP<br>(PF00230)                                        |        |
|                    | 12 | symbB.v1.2.005231 | 40 | 29 | 14 | symbB1.EST_k37c20_4845,<br>symbB1.EST_k37c20_4846,<br>symbB1.EST_k37c20_11532      | 293  | Epimerase<br>(PF01370),<br>cNMP_binding<br>(PF00027),<br>Chloroa_b-bind<br>(PF00504) |        |
|                    | 13 | symbB.v1.2.005251 | 7  | 6  | 1  | symbB1.EST_k37c20_7127                                                             | 304  | Chloroa_b-bind<br>(PF00504)                                                          |        |

|    |                   |    |    |    |                                                                                                            |      |                                                                                      |
|----|-------------------|----|----|----|------------------------------------------------------------------------------------------------------------|------|--------------------------------------------------------------------------------------|
| 14 | symbB.v1.2.005437 | 12 | 8  | 4  | symbB1.EST_k37c20_6587                                                                                     | 312  | Chloroa_b-bind<br>(PF00504)                                                          |
| 15 | symbB.v1.2.006212 | 23 | 16 | 12 | symbB1.EST_k37c20_8481,<br>symbB1.EST_k37c20_877                                                           | 355  | Chloroa_b-bind<br>(PF00504)                                                          |
| 16 | symbB.v1.2.006213 | 20 | 18 | 8  | symbB1.EST_k37c20_2795                                                                                     | 355  | Chloroa_b-bind<br>(PF00504)                                                          |
| 17 | symbB.v1.2.006472 | 9  | 8  | 3  | symbB1.EST_k37c20_32759,<br>symbB1.EST_k37c20_7255                                                         | 325  | Epimerase<br>(PF01370),<br>cNMP_binding<br>(PF00027),<br>Chloroa_b-bind<br>(PF00504) |
| 18 | symbB.v1.2.006473 | 6  | 15 | 4  | symbB1.EST_k37c20_7255,<br>symbB1.EST_k37c20_4302                                                          | 325  | Chloroa_b-bind<br>(PF00504)                                                          |
| 19 | symbB.v1.2.006873 | 3  | 6  | 1  | symbB1.EST_k37c20_644                                                                                      | 382  | Chloroa_b-bind<br>(PF00504)                                                          |
| 20 | symbB.v1.2.006875 | 16 | 13 | 2  | symbB1.EST_k37c20_14960,<br>symbB1.EST_k37c20_14962,<br>symbB1.EST_k37c20_2817,<br>symbB1.EST_k37c20_2820  | 382  | Chloroa_b-bind<br>(PF00504)                                                          |
| 21 | symbB.v1.2.007477 | 7  | 7  | 3  | symbB1.EST_k37c20_47102,<br>symbB1.EST_k37c20_47103                                                        | 410  | Chloroa_b-bind<br>(PF00504)                                                          |
| 22 | symbB.v1.2.007571 | 11 | 6  | 1  | symbB1.EST_k37c20_24441                                                                                    | 461  | Chloroa_b-bind<br>(PF00504)                                                          |
| 23 | symbB.v1.2.007877 | 8  | 6  | 2  | symbB1.EST_k37c20_16591                                                                                    | 482  | Chloroa_b-bind<br>(PF00504)                                                          |
| 24 | symbB.v1.2.008549 | 2  | 2  | 0  | symbB1.EST_k37c20_20167                                                                                    | 538  |                                                                                      |
| 25 | symbB.v1.2.010108 | 19 | 13 | 8  | symbB1.EST_k37c20_16307,<br>symbB1.EST_k37c20_16308,<br>symbB1.EST_k37c20_2507                             | 654  | Chloroa_b-bind<br>(PF00504)                                                          |
| 26 | symbB.v1.2.010109 | 21 | 14 | 4  | symbB1.EST_k37c20_475                                                                                      | 654  | Chloroa_b-bind<br>(PF00504)                                                          |
| 27 | symbB.v1.2.010521 | 17 | 9  | 1  | symbB1.EST_k37c20_12044,<br>symbB1.EST_k37c20_12045,<br>symbB1.EST_k37c20_12043,<br>symbB1.EST_k37c20_4242 | 690  | Chloroa_b-bind<br>(PF00504)                                                          |
| 28 | symbB.v1.2.010522 | 19 | 8  | 4  | symbB1.EST_k37c20_31535                                                                                    | 690  | Chloroa_b-bind<br>(PF00504), dDENN<br>(PF03455),<br>DUF547 (PF04784)                 |
| 29 | symbB.v1.2.011071 | 10 | 9  | 0  | symbB1.EST_k37c20_2584,<br>symbB1.EST_k37c20_2583                                                          | 738  | Chloroa_b-bind<br>(PF00504)                                                          |
| 30 | symbB.v1.2.011270 | 1  | 1  | 1  | symbB1.EST_k37c20_38079                                                                                    | 753  | Chloroa_b-bind<br>(PF00504)                                                          |
| 31 | symbB.v1.2.011302 | 2  | 1  | 1  | symbB1.EST_k37c20_47037,<br>symbB1.EST_k37c20_7606                                                         | 735  | Chloroa_b-bind<br>(PF00504)                                                          |
| 32 | symbB.v1.2.011361 | 28 | 16 | 15 | symbB1.EST_k37c20_7019,<br>symbB1.EST_k37c20_48349,<br>symbB1.EST_k37c20_23874                             | 741  | Chloroa_b-bind<br>(PF00504)                                                          |
| 33 | symbB.v1.2.012424 | 2  | 0  | 1  | symbB1.EST_k37c20_4579,<br>symbB1.EST_k37c20_59568                                                         | 849  | Chloroa_b-bind<br>(PF00504)                                                          |
| 34 | symbB.v1.2.012918 | 20 | 17 | 8  | symbB1.EST_k37c20_13288,<br>symbB1.EST_k37c20_36454                                                        | 903  | FtsJ (PF01728),<br>Chloroa_b-bind<br>(PF00504)                                       |
| 35 | symbB.v1.2.016027 | 12 | 8  | 7  | symbB1.EST_k37c20_10495,<br>symbB1.EST_k37c20_20836                                                        | 1188 | Chloroa_b-bind<br>(PF00504)                                                          |
| 36 | symbB.v1.2.016170 | 3  | 1  | 0  | –                                                                                                          | 1226 | Chloroa_b-bind<br>(PF00504)                                                          |
| 37 | symbB.v1.2.016171 | 3  | 3  | 0  | –                                                                                                          | 1226 | Chloroa_b-bind<br>(PF00504)                                                          |
| 38 | symbB.v1.2.016253 | 3  | 3  | 1  | symbB1.EST_k37c20_3009                                                                                     | 1233 | Chloroa_b-bind<br>(PF00504)                                                          |
| 39 | symbB.v1.2.016255 | 8  | 6  | 2  | symbB1.EST_k37c20_4037                                                                                     | 1233 | Chloroa_b-bind<br>(PF00504)                                                          |

|    |                   |    |    |    |                                                                              |      |                                                              |
|----|-------------------|----|----|----|------------------------------------------------------------------------------|------|--------------------------------------------------------------|
| 40 | symbB.v1.2.016256 | 0  | 0  | 0  | symbB1.EST_k37c20_4035,<br>symbB1.EST_k37c20_4036,<br>symbB1.EST_k37c20_4038 | 1233 | Chloroa_b-bind<br>(PF00504)                                  |
| 41 | symbB.v1.2.016257 | 1  | 1  | 4  | symbB1.EST_k37c20_4035,<br>symbB1.EST_k37c20_4036,<br>symbB1.EST_k37c20_4038 | 1233 | Chloroa_b-bind<br>(PF00504)                                  |
| 42 | symbB.v1.2.016373 | 4  | 1  | 1  | symbB1.EST_k37c20_25398                                                      | 1243 | Chloroa_b-bind<br>(PF00504)                                  |
| 43 | symbB.v1.2.017478 | 12 | 6  | 10 | symbB1.EST_k37c20_17472                                                      | 1363 | Chloroa_b-bind<br>(PF00504)                                  |
| 44 | symbB.v1.2.017479 | 6  | 0  | 1  | –                                                                            | 1363 | Chloroa_b-bind<br>(PF00504)                                  |
| 45 | symbB.v1.2.017480 | 18 | 11 | 8  | symbB1.EST_k37c20_17467                                                      | 1363 | Chloroa_b-bind<br>(PF00504)                                  |
| 46 | symbB.v1.2.018027 | 16 | 10 | 7  | symbB1.EST_k37c20_49160                                                      | 1374 | Chloroa_b-bind<br>(PF00504)                                  |
| 47 | symbB.v1.2.019686 | 18 | 7  | 10 | symbB1.EST_k37c20_3155                                                       | 1622 | Chloroa_b-bind<br>(PF00504)                                  |
| 48 | symbB.v1.2.019932 | 7  | 3  | 2  | –                                                                            | 1652 | Exo_endo_phos<br>(PF03372)                                   |
| 49 | symbB.v1.2.019935 | 0  | 0  | 0  | –                                                                            | 1652 | Chloroa_b-bind<br>(PF00504)                                  |
| 50 | symbB.v1.2.020974 | 3  | 13 | 1  | symbB1.EST_k37c20_4529                                                       | 1791 | Chloroa_b-bind<br>(PF00504)                                  |
| 51 | symbB.v1.2.022533 | 12 | 9  | 1  | –                                                                            | 2006 | LRR_5 (PF13306),<br>Chloroa_b-bind<br>(PF00504)              |
| 52 | symbB.v1.2.023630 | 0  | 0  | 0  | –                                                                            | 2176 | Chloroa_b-bind<br>(PF00504)                                  |
| 53 | symbB.v1.2.024680 | 6  | 11 | 3  | symbB1.EST_k37c20_14787                                                      | 2350 | Chloroa_b-bind<br>(PF00504)                                  |
| 54 | symbB.v1.2.024681 | 7  | 9  | 4  | symbB1.EST_k37c20_14788                                                      | 2350 | Chloroa_b-bind<br>(PF00504)                                  |
| 55 | symbB.v1.2.024854 | 5  | 4  | 3  | –                                                                            | 2380 | Chloroa_b-bind<br>(PF00504)                                  |
| 56 | symbB.v1.2.024892 | 17 | 13 | 4  | symbB1.EST_k37c20_76,<br>symbB1.EST_k37c20_43447                             | 2388 | Nucleotid_trans<br>(PF03407),<br>Chloroa_b-bind<br>(PF00504) |
| 57 | symbB.v1.2.026613 | 10 | 13 | 3  | symbB1.EST_k37c20_1949                                                       | 2674 | Chloroa_b-bind<br>(PF00504)                                  |
| 58 | symbB.v1.2.026778 | 14 | 7  | 2  | symbB1.EST_k37c20_32042,<br>symbB1.EST_k37c20_58129                          | 2704 | Chloroa_b-bind<br>(PF00504)                                  |
| 59 | symbB.v1.2.028203 | 5  | 4  | 9  | symbB1.EST_k37c20_36237                                                      | 2965 | Chloroa_b-bind<br>(PF00504)                                  |
| 60 | symbB.v1.2.028302 | 0  | 0  | 0  | –                                                                            | 2947 | Chloroa_b-bind<br>(PF00504)                                  |
| 61 | symbB.v1.2.028303 | 8  | 0  | 1  | –                                                                            | 2947 | Chloroa_b-bind<br>(PF00504)                                  |
| 62 | symbB.v1.2.028352 | 7  | 8  | 3  | symbB1.EST_k37c20_4560                                                       | 2996 | Chloroa_b-bind<br>(PF00504),<br>Coprogen_oxidas<br>(PF01218) |
| 63 | symbB.v1.2.028353 | 22 | 21 | 10 | symbB1.EST_k37c20_28632                                                      | 2996 | Chloroa_b-bind<br>(PF00504),<br>Exostosin<br>(PF03016)       |
| 64 | symbB.v1.2.028830 | 9  | 10 | 0  | symbB1.EST_k37c20_36093                                                      | 3090 | Chloroa_b-bind<br>(PF00504)                                  |
| 65 | symbB.v1.2.029304 | 0  | 0  | 0  | symbB1.EST_k37c20_3323,<br>symbB1.EST_k37c20_3324                            | 3191 | Chloroa_b-bind<br>(PF00504)                                  |
| 66 | symbB.v1.2.029305 | 0  | 0  | 0  | –                                                                            | 3191 | Chloroa_b-bind<br>(PF00504)                                  |
| 67 | symbB.v1.2.030315 | 9  | 5  | 1  | symbB1.EST_k37c20_627,<br>symbB1.EST_k37c20_4455,<br>symbB1.EST_k37c20_55765 | 3402 | Chloroa_b-bind<br>(PF00504), Rieske<br>(PF00355)             |
| 68 | symbB.v1.2.030436 | 5  | 6  | 3  | symbB1.EST_k37c20_13237                                                      | 3430 | Chloroa_b-bind<br>(PF00504)                                  |

|    |                   |    |    |    |                                                                                                         |      |                                                              |
|----|-------------------|----|----|----|---------------------------------------------------------------------------------------------------------|------|--------------------------------------------------------------|
| 69 | symbB.v1.2.030463 | 2  | 2  | 0  | symbB1.EST_k37c20_41411                                                                                 | 3437 | Chloroa_b-bind<br>(PF00504),<br>ubiquitin<br>(PF00240)       |
| 70 | symbB.v1.2.030607 | 4  | 4  | 1  | –                                                                                                       | 3404 | Chloroa_b-bind<br>(PF00504)                                  |
| 71 | symbB.v1.2.030608 | 6  | 6  | 1  | symbB1.EST_k37c20_1458                                                                                  | 3404 | Chloroa_b-bind<br>(PF00504)                                  |
| 72 | symbB.v1.2.030609 | 6  | 2  | 2  | symbB1.EST_k37c20_1460,<br>symbB1.EST_k37c20_1456,<br>symbB1.EST_k37c20_1455,<br>symbB1.EST_k37c20_1458 | 3404 | Chloroa_b-bind<br>(PF00504)                                  |
| 73 | symbB.v1.2.033058 | 25 | 23 | 7  | symbB1.EST_k37c20_5361,<br>symbB1.EST_k37c20_7743                                                       | 4047 | Peptidase_M16_C<br>(PF05193),<br>Chloroa_b-bind<br>(PF00504) |
| 74 | symbB.v1.2.033169 | 6  | 1  | 0  | symbB1.EST_k37c20_14407                                                                                 | 4084 | Chloroa_b-bind<br>(PF00504)                                  |
| 75 | symbB.v1.2.033532 | 18 | 5  | 2  | –                                                                                                       | 4179 | La (PF05383),<br>Chloroa_b-bind<br>(PF00504)                 |
| 76 | symbB.v1.2.033682 | 3  | 1  | 3  | symbB1.EST_k37c20_9962,<br>symbB1.EST_k37c20_9963,<br>symbB1.EST_k37c20_9964                            | 4219 | Chloroa_b-bind<br>(PF00504)                                  |
| 77 | symbB.v1.2.034225 | 9  | 9  | 3  | –                                                                                                       | 4384 | Chloroa_b-bind<br>(PF00504)                                  |
| 78 | symbB.v1.2.037219 | 4  | 3  | 0  | symbB1.EST_k37c20_2818                                                                                  | 5435 | Chloroa_b-bind<br>(PF00504)                                  |
| 79 | symbB.v1.2.037220 | 13 | 4  | 1  | symbB1.EST_k37c20_10475                                                                                 | 5435 | Chloroa_b-bind<br>(PF00504)                                  |
| 80 | symbB.v1.2.037221 | 3  | 3  | 0  | –                                                                                                       | 5435 | Chloroa_b-bind<br>(PF00504)                                  |
| 81 | symbB.v1.2.037222 | 1  | 0  | 0  | symbB1.EST_k37c20_2818                                                                                  | 5435 | Chloroa_b-bind<br>(PF00504)                                  |
| 82 | symbB.v1.2.037223 | 7  | 1  | 0  | symbB1.EST_k37c20_5038                                                                                  | 5435 | Chloroa_b-bind<br>(PF00504)                                  |
| 83 | symbB.v1.2.037312 | 0  | 0  | 0  | –                                                                                                       | 5475 | Chloroa_b-bind<br>(PF00504)                                  |
| 84 | symbB.v1.2.037313 | 1  | 0  | 1  | –                                                                                                       | 5475 | Chloroa_b-bind<br>(PF00504)                                  |
| 85 | symbB.v1.2.037730 | 0  | 0  | 0  | symbB1.EST_k37c20_3367                                                                                  | 5651 | Chloroa_b-bind<br>(PF00504)                                  |
| 86 | symbB.v1.2.038122 | 0  | 0  | 0  | –                                                                                                       | 5832 | Chloroa_b-bind<br>(PF00504)                                  |
| 87 | symbB.v1.2.038123 | 0  | 0  | 0  | –                                                                                                       | 5832 | Chloroa_b-bind<br>(PF00504)                                  |
| 88 | symbB.v1.2.038124 | 23 | 24 | 18 | symbB1.EST_k37c20_28902,<br>symbB1.EST_k37c20_55802                                                     | 5832 | Chloroa_b-bind<br>(PF00504)                                  |
| 89 | symbB.v1.2.038157 | 15 | 4  | 3  | symbB1.EST_k37c20_642,<br>symbB1.EST_k37c20_643,<br>symbB1.EST_k37c20_645                               | 5850 | Chloroa_b-bind<br>(PF00504), RVT_2<br>(PF07727)              |
| 90 | symbB.v1.2.038449 | 9  | 8  | 10 | symbB1.EST_k37c20_8977                                                                                  | 5990 | Chloroa_b-bind<br>(PF00504)                                  |
| 91 | symbB.v1.2.038694 | 3  | 1  | 2  | –                                                                                                       | 6128 | Chloroa_b-bind<br>(PF00504)                                  |
| 92 | symbB.v1.2.039010 | 6  | 2  | 1  | –                                                                                                       | 6293 | Chloroa_b-bind<br>(PF00504)                                  |
| 93 | symbB.v1.2.039011 | 4  | 3  | 1  | –                                                                                                       | 6293 | Chloroa_b-bind<br>(PF00504)                                  |
| 94 | symbB.v1.2.039815 | 10 | 5  | 1  | –                                                                                                       | 6803 | Chloroa_b-bind<br>(PF00504)                                  |
| 95 | symbB.v1.2.041094 | 8  | 0  | 0  | –                                                                                                       | 7819 | Chloroa_b-bind<br>(PF00504)                                  |
| 96 | symbB.v1.2.041290 | 1  | 0  | 0  | –                                                                                                       | 8023 | Chloroa_b-bind<br>(PF00504)                                  |
| 97 | symbB.v1.2.041291 | 9  | 6  | 4  | –                                                                                                       | 8023 | Chloroa_b-bind<br>(PF00504)                                  |
| 98 | symbB.v1.2.042135 | 2  | 1  | 1  | –                                                                                                       | 9320 | Chloroa_b-bind<br>(PF00504)                                  |

|     |                   |   |   |   |   |       |                             |
|-----|-------------------|---|---|---|---|-------|-----------------------------|
| 99  | symbB.v1.2.042413 | 2 | 0 | 0 | – | 8178  | Chloroa_b-bind<br>(PF00504) |
| 100 | symbB.v1.2.042811 | 2 | 0 | 0 | – | 11148 | Chloroa_b-bind<br>(PF00504) |
| 101 | symbB.v1.2.043368 | 1 | 0 | 0 | – | 14023 | Chloroa_b-bind<br>(PF00504) |

### Photosystem I

|             |                   |                   |    |    |    |                                                                               |            |                             |        |
|-------------|-------------------|-------------------|----|----|----|-------------------------------------------------------------------------------|------------|-----------------------------|--------|
| <i>psaA</i> | JX094315-7        |                   |    |    |    | symbB1.comp56_c0_seq1,<br>mf105_rep_c3118,<br>mf105_rep_c3002                 | minicircle | K02689                      |        |
| <i>psaB</i> | JX094318          |                   |    |    |    | symbB1.comp37_c0_seq1,<br>mf105_rep_c1527                                     | minicircle | K02690                      |        |
| <i>psaC</i> | symbB.v1.2.013207 | 3                 | 4  | 1  |    | symbB1.EST_k37c20_56198                                                       | 929        | Fer4_7 (PF12838)            | K02691 |
| <i>psaD</i> | 1                 | symbB.v1.2.037582 | 0  | 0  | 0  | symbB1.EST_k37c20_6446                                                        | 5592       | PsaD (PF02531)              | K02692 |
|             | 2                 | symbB.v1.2.039732 | 11 | 12 | 1  | symbB1.EST_k37c20_22702,<br>symbB1.EST_k37c20_49742                           | 6754       | PsaD (PF02531)              | K02692 |
|             | 3                 | symbB.v1.2.037583 | 0  | 0  | 0  | symbB1.EST_k37c20_59567,<br>symbB1.EST_k37c20_6446,<br>symbB1.EST_k37c20_2434 | 5592       | PsaD (PF02531)              | K02692 |
| <i>psaE</i> | 1                 | symbB.v1.2.001643 | 5  | 3  | 0  | symbB1.EST_k37c20_55546,<br>symbB1.EST_k37c20_3550                            | 86         | PSI_PsaE<br>(PF02427)       | K02693 |
|             | 2                 | symbB.v1.2.028843 | 1  | 1  | 0  | symbB1.EST_k37c20_9048                                                        | 3093       | PSI_PsaE<br>(PF02427)       | K02693 |
| <i>psaF</i> | 1                 | symbB.v1.2.025465 | 2  | 0  | 0  | –                                                                             | 2472       | PSI_PsaF<br>(PF02507)       | K02694 |
|             | 2                 | symbB.v1.2.025464 | 4  | 2  | 0  | symbB1.EST_k37c20_8188,<br>symbB1.EST_k37c20_1974                             | 2472       | PSI_PsaF<br>(PF02507)       | K02694 |
|             | 3                 | symbB.v1.2.012847 | 2  | 0  | 0  | symbB1.EST_k37c20_44666                                                       | 887        | PSI_PsaF<br>(PF02507)       | K02694 |
| <i>psaG</i> | –                 |                   |    |    | –  |                                                                               |            | PSI_PSAK<br>(PF01241)       |        |
| <i>psaH</i> | –                 |                   |    |    | –  |                                                                               |            | PSI_PsaH<br>(PF03244)       |        |
| <i>psaI</i> | –                 |                   |    |    | –  |                                                                               |            | PSI_8 (PF00796)             |        |
| <i>psaJ</i> | 1                 | symbB.v1.2.027533 | 5  | 4  | 0  | symbB1.EST_k37c20_2543                                                        | 2832       | PSI_PsaJ<br>(PF01701)       |        |
|             | 2                 | symbB.v1.2.027534 | 5  | 4  | 0  | symbB1.EST_k37c20_21955                                                       | 2832       | PSI_PsaJ<br>(PF01701)       |        |
|             | 3                 | symbB.v1.2.027535 | 16 | 24 | 13 | symbB1.EST_k37c20_13143                                                       | 2832       | PSI_PsaJ<br>(PF01701)       |        |
| <i>psaK</i> | –                 |                   |    |    | –  |                                                                               |            | PSI_PSAK<br>(PF01241)       |        |
| <i>psaL</i> | 1                 | symbB.v1.2.037928 | 3  | 0  | 0  | symbB1.EST_k37c20_2082                                                        | 5742       | PsaL (PF02605)              |        |
|             | 2                 | symbB.v1.2.037929 | 1  | 0  | 0  | symbB1.EST_k37c20_16360                                                       | 5742       | PsaL (PF02605)              |        |
|             | 3                 | symbB.v1.2.027137 | 7  | 4  | 4  | symbB1.EST_k37c20_8521                                                        | 2764       | PsaL (PF02605)              |        |
| <i>psaM</i> | –                 |                   |    |    | –  |                                                                               |            | PsaM (PF07465)              |        |
| <i>psaN</i> | –                 |                   |    |    | –  |                                                                               |            | PsaN (PF05479)              |        |
| <i>psaO</i> | –                 |                   |    |    | –  |                                                                               |            | –                           |        |
| <i>psaP</i> | –                 |                   |    |    | –  |                                                                               |            | DUF4308<br>(PF14159)        |        |
| <i>psaX</i> | –                 |                   |    |    | –  |                                                                               |            | PsaX (PF08078)              |        |
| <i>lhca</i> | –                 |                   |    |    | –  |                                                                               |            | Chloroa_b-bind<br>(PF00504) |        |

### Cytochrome b6f complex

|             |   |                   |    |   |   |                                                                              |      |                             |        |
|-------------|---|-------------------|----|---|---|------------------------------------------------------------------------------|------|-----------------------------|--------|
| <i>petA</i> | 1 | symbB.v1.2.018517 | 15 | 3 | 6 | symbB1.EST_k37c20_4757,<br>symbB1.EST_k37c20_4769,<br>symbB1.EST_k37c20_4770 | 1480 | Apocytochr_F_C<br>(PF01333) | K02634 |
|             | 2 | symbB.v1.2.018518 | 6  | 1 | 3 | symbB1.EST_k37c20_4765,<br>symbB1.EST_k37c20_4752,<br>symbB1.EST_k37c20_4767 | 1480 | Apocytochr_F_C<br>(PF01333) |        |
|             | 3 | symbB.v1.2.018520 | 5  | 4 | 3 | symbB1.EST_k37c20_8370,<br>symbB1.EST_k37c20_4763,<br>symbB1.EST_k37c20_4782 | 1480 | Apocytochr_F_C<br>(PF01333) |        |

|                      |   |                   |    |    |   |                                                                                                         |            |                                                           |        |  |
|----------------------|---|-------------------|----|----|---|---------------------------------------------------------------------------------------------------------|------------|-----------------------------------------------------------|--------|--|
|                      | 4 | symbB.v1.2.020196 | 3  | 1  | 2 | symbB1.EST_k37c20_4777                                                                                  | 1681       | Apocytochr_F_C<br>(PF01333)                               |        |  |
|                      | 5 | symbB.v1.2.020193 | 12 | 9  | 2 | symbB1.EST_k37c20_4778                                                                                  | 1681       | Apocytochr_F_C<br>(PF01333)                               |        |  |
| <i>petB</i>          |   | JX094309-10       |    |    |   | symbB1.EST_k37c20_1147,<br>mf105_rep_c1660                                                              | minicircle |                                                           | K02635 |  |
| <i>petC</i>          | 1 | symbB.v1.2.006097 | 19 | 10 | 6 | symbB1.EST_k37c20_2827                                                                                  | 359        | CytB6-F_Fe-S<br>(PF08802), Rieske<br>(PF00355)            | K02636 |  |
|                      | 2 | symbB.v1.2.006095 | 3  | 0  | 0 | symbB1.EST_k37c20_11748                                                                                 | 359        | CytB6-F_Fe-S<br>(PF08802), Rieske<br>(PF00355)            |        |  |
|                      | 3 | symbB.v1.2.006093 | 2  | 1  | 0 | symbB1.EST_k37c20_11749                                                                                 | 359        | CytB6-F_Fe-S<br>(PF08802), Rieske<br>(PF00355)            |        |  |
|                      | 4 | symbB.v1.2.006094 | 2  | 1  | 0 | symbB1.EST_k37c20_11747                                                                                 | 359        | CytB6-F_Fe-S<br>(PF08802), Rieske<br>(PF00355)            |        |  |
| <i>petD</i>          |   | JX094311-14       |    |    |   | symbB1.comp26_c0_seq1,<br>mf105_rep_c797                                                                | minicircle |                                                           | K02637 |  |
| <i>petG</i>          | 1 | symbB.v1.2.003308 | 5  | 7  | 4 | symbB1.EST_k37c20_32837                                                                                 | 182        | PetG (PF02529)                                            |        |  |
|                      | 2 | symbB.v1.2.000994 | 11 | 4  | 0 | symbB1.EST_k37c20_17957                                                                                 | 43         | PetG (PF02529)                                            |        |  |
|                      | 3 | symbB.v1.2.009131 | 3  | 1  | 0 | symbB1.EST_k37c20_56678                                                                                 | 577        | PetG (PF02529)                                            |        |  |
| <i>petL</i>          |   | –                 |    |    |   | –                                                                                                       |            | PetL (PF05115)                                            |        |  |
| <i>petM</i>          |   | –                 |    |    |   | –                                                                                                       |            | PetM (PF08041)                                            |        |  |
| <i>petN</i>          | 1 | symbB.v1.2.029346 | 0  | 0  | 0 | symbB1.EST_k37c20_48119                                                                                 | 3201       | PetN (PF03742)                                            |        |  |
|                      | 2 | symbB.v1.2.029345 | 0  | 0  | 0 | symbB1.EST_k37c20_48119                                                                                 | 3201       | PetN (PF03742)                                            |        |  |
| <i>petO</i>          |   | –                 |    |    |   | –                                                                                                       |            |                                                           |        |  |
| <i>ccsA</i>          |   | symbB.v1.2.004806 | 12 | 14 | 3 |                                                                                                         | 270        | Cytochrom_C_asm<br>(PF01578)                              |        |  |
| <i>ccsI</i>          |   | symbB.v1.2.008118 | 8  | 6  | 1 | symbB1.EST_k37c20_20096                                                                                 | 500        | ResB (PF05140)                                            | K07399 |  |
| <b>Cytochrome c6</b> |   |                   |    |    |   |                                                                                                         |            |                                                           |        |  |
| <i>petJ</i>          | 1 | symbB.v1.2.004909 | 5  | 3  | 0 | symbB1.EST_k37c20_31635                                                                                 | 263        | Cytochrome_CBB3<br>(PF13442),<br>Cytochrom_C<br>(PF00034) | K08906 |  |
|                      | 2 | symbB.v1.2.031786 | 0  | 0  | 0 | symbB1.EST_k37c20_64213,<br>symbB1.EST_k37c20_5653,<br>symbB1.EST_k37c20_55768                          | 3728       | Cytochrome_CBB3<br>(PF13442)                              | K08906 |  |
|                      | 3 | symbB.v1.2.036874 | 0  | 0  | 0 | symbB1.EST_k37c20_5651,<br>symbB1.EST_k37c20_55769,s<br>ymbB1.EST_k37c20_5650                           | 5310       | Cytochrome_CBB3<br>(PF13442)                              | K08906 |  |
| <i>petF</i>          | 1 | symbB.v1.2.035732 | 0  | 0  | 0 | -                                                                                                       | 4875       | Fer2 (PF00111)                                            | K02639 |  |
|                      | 2 | symbB.v1.2.035731 | 0  | 0  | 0 | symbB1.EST_k37c20_1362,<br>symbB1.EST_k37c20_1364,<br>symbB1.EST_k37c20_1361,<br>symbB1.EST_k37c20_1360 | 4875       | Fer2 (PF00111)                                            | K02639 |  |
|                      | 3 | symbB.v1.2.037890 | 0  | 0  | 0 | symbB1.EST_k37c20_44125,<br>symbB1.EST_k37c20_44126,<br>symbB1.EST_k37c20_1363                          | 5725       | Fer2 (PF00111)                                            | K02639 |  |
| <i>petH</i>          | 1 | symbB.v1.2.040184 | 2  | 2  | 0 | symbB1.EST_k37c20_58858,<br>symbB1.EST_k37c20_5214                                                      | 7056       | NAD_binding_1<br>(PF00175)                                | K02641 |  |
|                      | 2 | symbB.v1.2.013928 | 4  | 2  | 1 | symbB1.EST_k37c20_149                                                                                   | 996        | NAD_binding_1<br>(PF00175)                                |        |  |
|                      | 3 | symbB.v1.2.014541 | 12 | 3  | 4 | symbB1.EST_k37c20_11159                                                                                 | 1066       | NAD_binding_1<br>(PF00175),<br>Lipase_3<br>(PF01764)      |        |  |
|                      | 4 | symbB.v1.2.014542 | 2  | 3  | 3 | symbB1.EST_k37c20_11157,<br>symbB1.EST_k37c20_11158                                                     | 1066       | NAD_binding_1<br>(PF00175)                                |        |  |
|                      | 5 | symbB.v1.2.036979 | 4  | 5  | 2 | symbB1.EST_k37c20_46801                                                                                 | 5347       | NAD_binding_1<br>(PF00175)                                |        |  |

|                          |   |                   |    |    |   |                                                                                 |            |                                                                                |          |
|--------------------------|---|-------------------|----|----|---|---------------------------------------------------------------------------------|------------|--------------------------------------------------------------------------------|----------|
|                          | 6 | symbB.v1.2.035012 | 23 | 15 | 8 | symbB1.EST_k37c20_4294                                                          | 4627       | DUF4326<br>(PF14216),<br>Exostosin<br>(PF03016),<br>NAD_binding_1<br>(PF00175) |          |
| <i>firC</i>              |   | symbB.v1.2.003535 | 16 | 12 | 8 | symbB1.EST_k37c20_24201                                                         | 196        | FeThRed_B<br>(PF02943)                                                         | K00535   |
| <i>trxM</i>              |   | symbB.v1.2.031355 | 0  | 0  | 0 | symbB1.EST_k37c20_60599                                                         | 3632       | Thioredoxin<br>(PF00085)                                                       | K03671   |
| <b>ATP synthase</b>      |   |                   |    |    |   |                                                                                 |            |                                                                                |          |
| <i>atpA</i>              |   | JX094304-6        |    |    |   | symbB1.comp193_c0_seq2,<br>mf105_rep_c2696                                      | minicircle |                                                                                | K02111   |
| <i>atpB</i>              |   | JX094307-8        |    |    |   | symbB1.comp144_c0_seq1,<br>mf105_rep_c562                                       | minicircle |                                                                                | K02112   |
| <i>atpC</i>              | 1 | symbB.v1.2.004028 | 6  | 4  | 3 | symbB1.EST_k37c20_7574                                                          | 227        | ATP-synt<br>(PF00231)                                                          |          |
|                          | 2 | symbB.v1.2.004029 | 6  | 4  | 3 | symbB1.EST_k37c20_7572,<br>symbB1.EST_k37c20_7574                               | 227        | ATP-synt<br>(PF00231)                                                          |          |
|                          | 3 | symbB.v1.2.004031 | 12 | 11 | 4 | symbB1.EST_k37c20_7575,<br>symbB1.EST_k37c20_29651,s<br>ymbB1.EST_k37c20_46079  | 227        | ATP-synt<br>(PF00231)                                                          |          |
| <i>atpD</i>              | 1 | symbB.v1.2.020826 | 1  | 1  | 2 | symbB1.EST_k37c20_7487                                                          | 1727       | OSCP (PF00213)                                                                 | K02113/0 |
|                          | 2 | symbB.v1.2.030497 | 1  | 0  | 0 | symbB1.EST_k37c20_16347                                                         | 3435       | OSCP (PF00213)                                                                 | K02113/0 |
|                          | 3 | symbB.v1.2.030498 | 0  | 0  | 0 | symbB1.EST_k37c20_16348                                                         | 3435       | OSCP (PF00213)                                                                 | K02113/0 |
| <i>atpE</i>              | 1 | symbB.v1.2.033719 | 11 | 7  | 2 | symbB1.EST_k37c20_47825,<br>symbB1.EST_k37c20_22113,<br>symbB1.EST_k37c20_18318 | 4230       | ATP-synt_DE_N<br>(PF02823)                                                     |          |
|                          | 2 | symbB.v1.2.013177 | 3  | 3  | 3 | symbB1.EST_k37c20_46231,<br>symbB1.EST_k37c20_29422                             | 926        | ATP-synt_DE_N<br>(PF02823)                                                     | K02114   |
| <i>atpF</i>              | 1 | symbB.v1.2.029247 | 15 | 14 | 8 | symbB1.comp1997_c0_seq1                                                         | 3178       | ATP-synt_B<br>(PF00430)                                                        |          |
|                          | 2 | symbB.v1.2.001381 | 8  | 9  | 0 | symbB1.comp36530_c0_seq2                                                        | 67         | ATP-synt_B<br>(PF00430)                                                        |          |
|                          | 3 | symbB.v1.2.022253 | 11 | 9  | 4 | symbB1.comp1138_c0_seq1                                                         | 1966       | ATP-synt_B<br>(PF00430)                                                        |          |
| <i>atpG</i>              | 1 | symbB.v1.2.007301 | 4  | 2  | 3 | symbB1.EST_k37c20_46210                                                         | 440        | ATP-synt_B<br>(PF00430)                                                        |          |
|                          | 2 | symbB.v1.2.007300 | 4  | 3  | 2 | symbB1.EST_k37c20_25042                                                         | 440        | ATP-synt_B<br>(PF00430)                                                        |          |
| <i>atpH</i>              | 1 | symbB.v1.2.000251 | 0  | 0  | 0 | symbB1.EST_k37c20_22098                                                         | 18         | ATP-synt_C<br>(PF00137)                                                        | K02110   |
|                          | 2 | symbB.v1.2.011430 | 0  | 0  | 0 | symbB1.EST_k37c20_8674                                                          | 767        | ATP-synt_C<br>(PF00137)                                                        | K02110   |
|                          | 3 | symbB.v1.2.003777 | 10 | 11 | 7 | symbB1.EST_k37c20_9469                                                          | 207        | ATP-synt_C<br>(PF00137)                                                        | K02110   |
| <i>atpI</i>              | 1 | symbB.v1.2.032748 | 5  | 6  | 1 | symbB1.EST_k37c20_1788                                                          | 3968       | ATP-synt_A<br>(PF00119)                                                        | K02108   |
|                          | 2 | symbB.v1.2.032747 | 6  | 5  | 1 | symbB1.EST_k37c20_1787                                                          | 3968       | ATP-synt_A<br>(PF00119)                                                        | K02108   |
| <b>Phycobiliproteins</b> |   |                   |    |    |   |                                                                                 |            |                                                                                |          |
| <i>apcA</i>              |   | –                 |    |    |   | –                                                                               |            | Phycobilisome<br>(PF00502)                                                     | K02092   |
| <i>apcB</i>              |   | –                 |    |    |   | –                                                                               |            | Phycobilisome<br>(PF00502)                                                     | K02093   |
| <i>apcD</i>              |   | –                 |    |    |   | –                                                                               |            | Phycobilisome<br>(PF00502)                                                     | K02095   |
| <i>apcE</i>              |   | –                 |    |    |   | –                                                                               |            | Phycobilisome<br>(PF00502)                                                     | K02096   |
| <i>apcF</i>              |   | –                 |    |    |   | –                                                                               |            | Phycobilisome<br>(PF00502)                                                     | K02097   |
| <i>cpcA</i>              |   | –                 |    |    |   | –                                                                               |            | Phycobilisome<br>(PF00502)                                                     | K02284   |



|                       |   |                    |    |    |    |                                                     |      |                                                       |          |  |
|-----------------------|---|--------------------|----|----|----|-----------------------------------------------------|------|-------------------------------------------------------|----------|--|
| <i>cpcB</i>           |   | –                  |    |    |    | –                                                   |      | Phycobilisome (PF00502)                               | K02285   |  |
| <b>Metabolism</b>     |   |                    |    |    |    |                                                     |      |                                                       |          |  |
| <b>Carbohydrates</b>  |   |                    |    |    |    |                                                     |      |                                                       |          |  |
| <i>cfxQ</i>           |   | symbB.v1.2.028709  | 29 | 25 | 9  | symbB1.EST_k37c20_14378                             | 3062 | AAA (PF00004)                                         | K06413   |  |
| <i>rbcL</i>           |   | symbB.v1.2.041360  | 3  | 0  | 0  | symbB1.EST_k37c20_13147                             | 8099 | RuBisCO_large (PF00016)                               | K01601   |  |
| <b>Lipids</b>         |   |                    |    |    |    |                                                     |      |                                                       |          |  |
| <i>acpP</i>           | 1 | symbB.v1.2.020352  | 5  | 1  | 2  | symbB1.EST_k37c20_46799                             | 1703 | PP-binding (PF00550)                                  | K02078   |  |
|                       | 2 | symbB.v1.2.020351  | 23 | 12 | 3  | symbB1.EST_k37c20_25813                             | 1703 | PP-binding (PF00550)                                  |          |  |
| <b>Nucleotides</b>    |   |                    |    |    |    |                                                     |      |                                                       |          |  |
| <i>carA</i>           |   | symbB.v1.2.027619  | 3  | 5  | 3  | symbB1.EST_k37c20_3378,<br>symbB1.EST_k37c20_9006   | 2810 | CPSase_sm_chain (PF00988)                             | K01956/0 |  |
| <b>Amino acids</b>    |   |                    |    |    |    |                                                     |      |                                                       |          |  |
| <i>glbB</i>           | 1 | symbB.v1.2.014989  | 45 | 37 | 20 | symbB1.EST_k37c20_6414                              | 1088 | GATase_2 (PF00310)                                    | K00264   |  |
|                       | 2 | symbB.v1.2.020534  | 18 | 14 | 5  | symbB1.EST_k37c20_22583                             | 1735 | GATase_2 (PF00310)                                    |          |  |
|                       | 3 | symbB.v1.2.017142  | 30 | 25 | 12 | symbB1.EST_k37c20_469                               | 1327 | GATase_2 (PF00310)                                    |          |  |
| <i>ilvB</i>           |   | symbB.v1.2.032800  | 18 | 14 | 2  | symbB1.EST_k37c20_3325                              | 3984 | TPP_enzyme_N (PF02776)                                | K01652   |  |
| <b>Complex sugars</b> |   |                    |    |    |    |                                                     |      |                                                       |          |  |
| <i>glmS</i>           | 1 | symbB.v1.2.007867  | 13 | 9  | 2  | symbB1.EST_k37c20_19261                             | 448  | SIS (PF01380)                                         | K00820   |  |
|                       | 2 | symbB.v1.2.024317  | 27 | 31 | 11 | symbB1.EST_k37c20_17650                             | 2282 | SIS (PF01380)                                         | K00820   |  |
| <b>Cofactors</b>      |   |                    |    |    |    |                                                     |      |                                                       |          |  |
| <i>chlI</i>           | 1 | symbB.v1.2.025433  | 12 | 13 | 3  | symbB1.EST_k37c20_7018                              | 2466 | Mg_chelatase (PF01078)                                | K03405   |  |
|                       | 2 | symbB.v1.2.031914  | 7  | 0  | 0  | symbB1.EST_k37c20_13445                             | 3736 | Mg_chelatase (PF01078)                                | K03405   |  |
| <i>cobA</i>           |   | symbB.v1.2.015591  | 8  | 8  | 2  | symbB1.EST_k37c20_50526                             | 1127 | TP_methylase (PF00590)                                | K02303   |  |
| <i>preA</i>           |   | symbB.v1.2.008416  | 6  | 14 | 2  | symbB1.EST_k37c20_51767                             | 529  | polyprenyl_synt (PF00348)                             | K05356   |  |
| <b>Transport</b>      |   |                    |    |    |    |                                                     |      |                                                       |          |  |
| <i>secA</i>           | 1 | symbB.v1.2.013318  | 0  | 0  | 0  | symbB1.EST_k37c20_32791                             | 938  | SecA_DEAD (PF07517)                                   | K03070   |  |
|                       | 2 | symbB.v1.2.028305  | 15 | 20 | 14 | symbB1.EST_k37c20_3645                              | 2947 | SecA_DEAD (PF07517)                                   | K03070   |  |
|                       | 3 | symbB.v1.2.024712  | 13 | 10 | 2  | symbB1.EST_k37c20_20304                             | 2359 | SecA_DEAD (PF07517)                                   |          |  |
| <i>secY</i>           |   | symbB.v1.2.012783  | 15 | 15 | 5  | symbB1.EST_k37c20_19185,<br>symbB1.EST_k37c20_33447 | 859  | SecY (PF00344)                                        | K03076   |  |
| <i>sufB</i>           |   | symbB.v1.2.011807  | 27 | 35 | 18 | symbB1.EST_k37c20_9193,<br>symbB1.EST_k37c20_9481   | 773  | UPF0051 (PF01458)                                     | K09014   |  |
| <i>tatC</i>           |   | symbB.v1.2.030075  | 33 | 10 | 3  | symbB1.EST_k37c20_39615                             | 3344 | TatC (PF00902)                                        | K03118   |  |
| <b>Genetic system</b> |   |                    |    |    |    |                                                     |      |                                                       |          |  |
| <b>RNA polymerase</b> |   |                    |    |    |    |                                                     |      |                                                       |          |  |
| <i>rpoA</i>           |   | symbB1.v1.2.001673 | 21 | 14 | 15 | symbB1.EST_k37c20_35742                             | 86   | RNA_pol_A_CTD (PF03118)                               | K03040/0 |  |
| <i>rpoB</i>           | 1 | symbB.v1.2.028322  | 23 | 17 | 6  | symbB1.EST_k37c20_13857                             | 2993 | RNA_pol_Rpb2_6 (PF00562)                              | K03043   |  |
|                       | 2 | symbB.v1.2.028323  | 15 | 13 | 4  | symbB1.EST_k37c20_13857                             | 2993 | RNA_pol_Rpb2_3 (PF04565)                              |          |  |
| <i>rpoC1</i>          |   | symbB.v1.2.030589  | 11 | 11 | 4  | symbB1.EST_k37c20_7300                              | 3465 | RNA_pol_Rpb1_2 (PF00623)                              | K03046   |  |
| <i>rpoC2</i>          |   | symbB.v1.2.011942  | 43 | 32 | 16 | symbB1.EST_k37c20_22007,<br>symbB1.EST_k37c20_37665 | 814  | RNA_pol_Rpb1_5 (PF04998),<br>RNA_pol_Rpb1_4 (PF05000) | K03046   |  |
| <b>Translation</b>    |   |                    |    |    |    |                                                     |      |                                                       |          |  |

|                           |   |                   |    |    |    |                                                                                 |      |                                            |          |
|---------------------------|---|-------------------|----|----|----|---------------------------------------------------------------------------------|------|--------------------------------------------|----------|
| <i>infB</i>               |   | symbB.v1.2.007711 | 22 | 39 | 21 | symbB1.EST_k37c20_3131,<br>symbB1.EST_k37c20_23525,<br>symbB1.EST_k37c20_12845  | 479  | IF2_N (PF04760)                            | K02519   |
| <i>tsf</i>                |   | symbB.v1.2.029333 | 5  | 7  | 7  | symbB1.EST_k37c20_13647                                                         | 3199 | EF_TS (PF00889)                            | K02357   |
| <i>tufA</i>               |   | symbB.v1.2.025951 | 5  | 11 | 3  | symbB1.EST_k37c20_2835,<br>symbB1.EST_k37c20_2836,<br>symbB1.EST_k37c20_2837    | 2552 | GTP_EFTU<br>(PF00009,<br>PF03144, PF03143) | K03231   |
| <b>Ribosomal Proteins</b> |   |                   |    |    |    |                                                                                 |      |                                            |          |
| <i>rpl1</i>               |   | symbB.v1.2.009383 | 17 | 10 | 3  | symbB1.EST_k37c20_11396                                                         | 595  | Ribosomal_L1<br>(PF00687)                  | K02863   |
| <i>rpl2</i>               |   | symbB.v1.2.007444 | 28 | 16 | 9  | symbB1.EST_k37c20_47934,<br>symbB1.EST_k37c20_36558,<br>symbB1.EST_k37c20_31287 | 445  | Ribosomal_L2_C<br>(PF03947)                | K02886   |
| <i>rpl3</i>               |   | symbB.v1.2.003502 | 7  | 7  | 5  | symbB1.EST_k37c20_48217                                                         | 197  | Ribosomal_L3<br>(PF00297)                  | K02906   |
| <i>rpl3</i>               |   | symbB.v1.2.020107 | 11 | 6  | 4  | symbB1.EST_k37c20_30891                                                         | 1674 | Ribosomal_L3<br>(PF00297)                  | K02906   |
| <i>rpl11</i>              | 1 | symbB.v1.2.001567 | 3  | 13 | 1  | symbB1.EST_k37c20_27089                                                         | 3577 | Ribosomal_L11_N<br>(PF03946)               | K02867   |
|                           | 2 | symbB.v1.2.031116 | 0  | 0  | 0  | symbB1.EST_k37c20_46642                                                         | 88   | Ribosomal_L11_N<br>(PF03946)               | K02867   |
| <i>rpl12</i>              | 1 | symbB.v1.2.006936 | 10 | 4  | 4  | symbB1.EST_k37c20_35887                                                         | 400  | Ribosomal_L12<br>(PF00542)                 | K02935   |
|                           | 2 | symbB.v1.2.007734 | 10 | 9  | 4  | symbB1.EST_k37c20_43211                                                         | 457  | Ribosomal_L12<br>(PF00542)                 | K02935   |
|                           | 3 | symbB.v1.2.016557 | 10 | 8  | 4  | symbB1.EST_k37c20_5665                                                          | 1261 | Ribosomal_L12<br>(PF00542)                 | K02935   |
|                           | 4 | symbB.v1.2.000698 | 3  | 1  | 3  | symbB1.EST_k37c20_24144                                                         | 40   | Ribosomal_L12<br>(PF00542)                 | K02935   |
| <i>rpl13</i>              |   | symbB.v1.2.021894 | 6  | 11 | 6  | symbB1.EST_k37c20_11014                                                         | 1900 | Ribosomal_L13<br>(PF00572)                 | K02871   |
| <i>rpl14</i>              |   | symbB.v1.2.031130 | 4  | 3  | 1  | symbB1.EST_k37c20_26909                                                         | 3574 | Ribosomal_L14<br>(PF00238)                 | K02874   |
| <i>rpl16</i>              |   | symbB.v1.2.034891 | 9  | 4  | 3  | symbB1.EST_k37c20_186                                                           | 4584 | Ribosomal_L16<br>(PF00252)                 | K02878   |
| <i>rpl16</i>              |   | symbB.v1.2.026617 | 8  | 7  | 2  | symbB1.EST_k37c20_61152                                                         | 2674 | Ribosomal_L16<br>(PF00252)                 | K02878   |
| <i>rpl20</i>              | 1 | symbB.v1.2.028173 | 3  | 4  | 0  | symbB1.EST_k37c20_51249                                                         | 2961 | Ribosomal_L20<br>(PF00453)                 | K02887   |
|                           | 2 | symbB.v1.2.034534 | 12 | 6  | 4  | symbB1.EST_k37c20_4660,<br>symbB1.EST_k37c20_5061                               | 4475 | Ribosomal_L20<br>(PF00453)                 | K02887   |
| <i>rpl21</i>              | 1 | symbB.v1.2.017666 | 8  | 10 | 2  | symbB1.EST_k37c20_46407                                                         | 1380 | Ribosomal_L21p<br>(PF00829)                | K02888/0 |
|                           | 2 | symbB.v1.2.017667 | 7  | 8  | 2  | symbB1.EST_k37c20_46407                                                         | 1380 | Ribosomal_L21p<br>(PF00829)                | K02888/0 |
| <i>rpl22</i>              |   | symbB.v1.2.026601 | 0  | 0  | 0  | symbB1.EST_k37c20_59873                                                         | 2672 | Ribosomal_L22<br>(PF00237)                 | K02890   |
| <i>rpl23</i>              |   | symbB.v1.2.021021 | 8  | 4  | 3  | symbB1.EST_k37c20_48685                                                         | 1795 | Ribosomal_L23<br>(PF00276)                 | K02895   |
| <i>rpl24</i>              |   | symbB.v1.2.019792 | 13 | 6  | 1  | symbB1.EST_k37c20_2539,<br>symbB1.EST_k37c20_2538                               | 1637 | Ribosomal_L23<br>(PF00467)                 | K02895   |
| <i>rpl27</i>              |   | symbB.v1.2.022514 | 7  | 5  | 3  | symbB1.EST_k37c20_38736                                                         | 2003 | Ribosomal_L27<br>(PF01016)                 | K02899   |
| <i>rpl31</i>              |   | symbB.v1.2.011799 | 3  | 9  | 1  | symbB1.EST_k37c20_47182                                                         | 773  | Ribosomal_L31<br>(PF01197)                 | K02899   |
| <i>rpl36</i>              |   | symbB.v1.2.012093 | 8  | 5  | 1  | symbB1.EST_k37c20_43895                                                         | 821  | Ribosomal_L36<br>(PF00444)                 | K02899   |
| <i>rps2</i>               |   | symbB.v1.2.016189 | 59 | 40 | 13 | symbB1.EST_k37c20_30752,<br>symbB1.EST_k37c20_8756                              | 1223 | Ribosomal_S2<br>(PF00318)                  | K02967   |
| <i>rps4</i>               |   | symbB.v1.2.009410 | 4  | 4  | 1  | symbB1.EST_k37c20_3181,<br>symbB1.EST_k37c20_3182                               | 557  | Ribosomal_S4<br>(PF00163)                  | K02986   |
| <i>rps9</i>               |   | symbB.v1.2.016652 | 6  | 6  | 4  | symbB1.EST_k37c20_38309                                                         | 1274 | Ribosomal_S9<br>(PF00380)                  | K02996   |
| <i>rps12</i>              | 1 | symbB.v1.2.004458 | 3  | 6  | 2  | symbB1.EST_k37c20_51368                                                         | 2893 | Ribosomal_S12<br>(PF00164)                 | K02950   |
|                           | 2 | symbB.v1.2.027863 | 10 | 5  | 5  | symbB1.EST_k37c20_6063                                                          | 249  | Ribosomal_S12<br>(PF00164)                 | K02950   |

|                                |   |                    |    |    |    |                                                     |      |                         |        |
|--------------------------------|---|--------------------|----|----|----|-----------------------------------------------------|------|-------------------------|--------|
| <i>rps16</i>                   |   | symbB.v1.2.013041  | 7  | 10 | 2  | symbB1.EST_k37c20_12315                             | 915  | Ribosomal_S16 (PF00886) | K02959 |
| <i>rps18</i>                   |   | symbB.v1.2.019232  | 20 | 7  | 8  | symbB1.EST_k37c20_80                                | 1567 | Ribosomal_S18 (PF01084) |        |
| <i>rps19</i>                   |   | symbB1.v1.2.026125 | 0  | 0  | 0  | symbB1.EST_k37c20_62582                             | 2587 | Ribosomal_S19 (PF00203) | K02965 |
| <b>Protein quality control</b> |   |                    |    |    |    |                                                     |      |                         |        |
| <i>clpC</i>                    | 1 | symbB.v1.2.014468  | 8  | 8  | 4  | symbB1.EST_k37c20_4653                              | 1055 | Clp_N (PF02861)         | K03696 |
|                                | 2 | symbB.v1.2.028955  | 22 | 14 | 8  | symbB1.EST_k37c20_381                               | 3121 | Clp_N (PF02861)         | K03696 |
| <i>clpP</i>                    | 1 | symbB.v1.2.025383  | 7  | 10 | 1  | symbB1.EST_k37c20_35751                             | 2458 | CLP_protease (PF00574)  | K01358 |
|                                | 2 | symbB.v1.2.028528  | 16 | 17 | 8  | symbB1.EST_k37c20_43359                             | 3032 | CLP_protease (PF00574)  | K01358 |
|                                | 3 | symbB.v1.2.008467  | 14 | 7  | 6  | symbB1.EST_k37c20_25146                             | 474  | CLP_protease (PF00574)  | K01358 |
| <i>dnaK</i>                    | 1 | symbB.v1.2.026933  | 8  | 10 | 3  | symbB1.EST_k37c20_1571,<br>symbB1.EST_k37c20_1570   | 2698 | HSP70 (PF00012)         | K04043 |
|                                | 2 | symbB.v1.2.026931  | 6  | 6  | 1  | symbB1.EST_k37c20_1569                              | 2698 | HSP70 (PF00012)         |        |
|                                | 3 | symbB.v1.2.026932  | 5  | 5  | 2  | symbB1.EST_k37c20_1568                              | 2698 | HSP70 (PF00012)         |        |
|                                | 4 | symbB.v1.2.041606  | 6  | 5  | 1  | symbB1.EST_k37c20_1568                              | 1089 | HSP70 (PF00012)         |        |
|                                | 5 | symbB.v1.2.014797  | 7  | 9  | 4  | symbB1.EST_k37c20_16510                             | 9398 | HSP70 (PF00012)         |        |
| <i>ftsH</i>                    | 1 | symbB.v1.2.009970  | 21 | 12 | 12 | symbB1.EST_k37c20_11246,<br>symbB1.EST_k37c20_12744 | 623  | AAA (PF00004)           | K03798 |
|                                | 2 | symbB.v1.2.026811  | 20 | 5  | 1  | symbB1.EST_k37c20_11246                             | 2711 | AAA (PF00004)           | K03798 |
|                                | 3 | symbB.v1.2.022940  | 35 | 19 | 5  | symbB1.EST_k37c20_12744                             | 2066 | AAA (PF00004)           | K03798 |
|                                | 4 | symbB.v1.2.028451  | 19 | 17 | 7  | symbB1.EST_k37c20_11246                             | 3018 | AAA (PF00004)           | K03798 |
| <i>groEL</i>                   | 1 | symbB.v1.2.034222  | 21 | 12 | 7  | symbB1.EST_k37c20_3046,<br>symbB1.EST_k37c20_3045   | 4383 | Cpn60_TCP1 (PF00118)    | K04077 |
|                                | 2 | symbB.v1.2.016853  | 22 | 14 | 5  | symbB1.EST_k37c20_7154                              | 1289 | Cpn60_TCP1 (PF00118)    | K04077 |
|                                | 3 | symbB.v1.2.023783  | 30 | 19 | 8  | symbB1.EST_k37c20_21115                             | 2205 | Cpn60_TCP1 (PF00118)    | K04077 |
|                                | 4 | symbB.v1.2.013239  | 24 | 25 | 4  | symbB1.EST_k37c20_10912                             | 891  | Cpn60_TCP1 (PF00118)    |        |
| <b>Unknown</b>                 |   |                    |    |    |    |                                                     |      |                         |        |
| <i>ycf3</i>                    |   | symbB.v1.2.008172  | 13 | 9  | 5  | symbB1.EST_k37c20_8962,<br>symbB1.EST_k37c20_16423  | 512  | TPR_11 (PF13414)        |        |
| <i>ycf4</i>                    |   | symbB.v1.2.027661  | 7  | 5  | 2  | symbB1.comp5277_c0_seq1                             | 2855 | Ycf4 (PF02392)          |        |
| <i>ycf19</i>                   |   | symbB.v1.2.026242  | 7  | 7  | 1  | symbB1.EST_k37c20_12378                             | 2606 | YGGT (PF02325)          | K02221 |
| <i>ycf53</i>                   |   | symbB.v1.2.006785  | 6  | 5  | 1  | symbB1.EST_k37c20_13544                             | 396  | GUN4 (PF05419)          |        |
| <i>ycf62/<br/>mesJ</i>         |   | symbB.v1.2.012612  | 8  | 1  | 4  | symbB1.EST_k37c20_43831                             | 874  | ATP_bind_3 (PF01171)    | K04075 |
| <b>rRNAs</b>                   |   |                    |    |    |    |                                                     |      |                         |        |
| <i>16S</i>                     |   | JX094331-2         |    |    |    | symbB1.comp6517_c0_seq1,<br>mf105_rep_c30787        |      | minicircle              |        |
| <i>23S</i>                     |   | JX094333-5         |    |    |    | symbB1.comp210_c1_seq10,<br>mf105_rep_c958          |      | minicircle              |        |

**Note:** transcriptome ID, mf105\_rep are transcriptomes independently generated for Roche 454 sequencer from Medina lab (Bayer et al. 2012).

**Table S2. List of all amino-acid substitution found in plastid-encoded genes of *Symbiodinium minutum*.**

|     | total | psbA | psbB | psbC | psbD | psbE | psbI | petB | petD | psaA | psaB | atpA | atpB |
|-----|-------|------|------|------|------|------|------|------|------|------|------|------|------|
| I→V | 62    | 1    | 5    | 6    | 3    | 2    | 0    | 3    | 3    | 12   | 15   | 4    | 8    |
| T→A | 40    | 0    | 3    | 5    | 0    | 0    | 0    | 0    | 1    | 8    | 18   | 1    | 4    |
| F→L | 6     | 0    | 0    | 0    | 0    | 0    | 0    | 0    | 0    | 2    | 3    | 0    | 1    |
| S→G | 14    | 0    | 3    | 2    | 0    | 0    | 0    | 1    | 1    | 2    | 4    | 0    | 1    |
| L→F | 11    | 0    | 2    | 1    | 0    | 0    | 0    | 2    | 1    | 2    | 2    | 1    | 0    |
| I→M | 10    | 1    | 0    | 0    | 0    | 0    | 0    | 0    | 1    | 3    | 2    | 3    | 0    |
| V→I | 11    | 0    | 1    | 0    | 0    | 1    | 0    | 1    | 1    | 3    | 2    | 1    | 1    |
| A→P | 11    | 0    | 0    | 1    | 1    | 1    | 0    | 2    | 3    | 1    | 1    | 0    | 1    |
| N→S | 7     | 0    | 1    | 0    | 0    | 0    | 0    | 0    | 0    | 2    | 2    | 1    | 1    |
| T→I | 9     | 0    | 1    | 0    | 0    | 0    | 0    | 0    | 0    | 4    | 2    | 1    | 1    |
| R→G | 9     | 0    | 0    | 1    | 0    | 0    | 0    | 0    | 0    | 4    | 0    | 2    | 2    |
| I→T | 8     | 0    | 1    | 0    | 0    | 0    | 0    | 1    | 0    | 3    | 2    | 1    | 0    |
| K→E | 8     | 0    | 0    | 0    | 0    | 0    | 0    | 1    | 1    | 4    | 0    | 2    | 0    |
| N→D | 8     | 0    | 0    | 0    | 0    | 0    | 0    | 0    | 0    | 0    | 2    | 3    | 3    |
| D→A | 4     | 0    | 0    | 0    | 0    | 0    | 0    | 0    | 0    | 1    | 0    | 2    | 1    |
| H→Y | 5     | 0    | 0    | 0    | 0    | 0    | 0    | 0    | 0    | 1    | 3    | 0    | 1    |
| I→A | 8     | 0    | 1    | 0    | 0    | 0    | 0    | 0    | 0    | 3    | 2    | 1    | 1    |
| L→S | 5     | 0    | 1    | 0    | 0    | 0    | 0    | 1    | 0    | 1    | 0    | 0    | 2    |
| M→V | 7     | 0    | 2    | 0    | 0    | 1    | 0    | 0    | 1    | 1    | 0    | 2    | 0    |
| S→F | 7     | 0    | 1    | 1    | 0    | 0    | 0    | 1    | 0    | 3    | 1    | 0    | 0    |
| T→V | 5     | 0    | 0    | 1    | 0    | 0    | 0    | 0    | 0    | 2    | 0    | 1    | 1    |
| F→S | 5     | 0    | 0    | 0    | 0    | 0    | 1    | 1    | 0    | 0    | 0    | 2    | 1    |
| G→A | 3     | 0    | 0    | 0    | 0    | 0    | 0    | 3    | 0    | 0    | 0    | 0    | 0    |
| Y→C | 5     | 0    | 0    | 0    | 0    | 0    | 0    | 0    | 0    | 2    | 0    | 2    | 1    |
| C→S | 5     | 0    | 0    | 0    | 0    | 0    | 0    | 0    | 3    | 0    | 0    | 1    | 1    |
| S→P | 5     | 0    | 1    | 0    | 0    | 0    | 0    | 0    | 0    | 1    | 0    | 0    | 3    |
| S→T | 5     | 1    | 0    | 1    | 0    | 0    | 0    | 0    | 0    | 0    | 3    | 0    | 0    |
| V→A | 5     | 0    | 0    | 1    | 1    | 0    | 0    | 0    | 2    | 1    | 0    | 0    | 0    |
| P→L | 4     | 0    | 0    | 0    | 0    | 0    | 0    | 0    | 1    | 0    | 2    | 0    | 1    |
| P→S | 4     | 0    | 0    | 0    | 0    | 0    | 0    | 0    | 0    | 2    | 1    | 0    | 1    |
| Y→S | 3     | 0    | 0    | 1    | 0    | 0    | 0    | 0    | 0    | 1    | 1    | 0    | 0    |
| A→T | 3     | 0    | 0    | 0    | 0    | 0    | 1    | 0    | 0    | 0    | 2    | 0    | 0    |
| E→G | 2     | 0    | 0    | 0    | 0    | 0    | 0    | 0    | 1    | 0    | 0    | 0    | 1    |
| H→R | 3     | 0    | 0    | 0    | 0    | 0    | 0    | 0    | 0    | 0    | 2    | 0    | 1    |
| K→R | 3     | 0    | 1    | 0    | 0    | 0    | 0    | 0    | 0    | 0    | 1    | 1    | 0    |
| N→G | 2     | 0    | 0    | 0    | 0    | 0    | 0    | 0    | 0    | 0    | 1    | 0    | 1    |
| S→L | 3     | 0    | 0    | 0    | 0    | 0    | 1    | 0    | 0    | 2    | 0    | 0    | 0    |
| T→M | 2     | 0    | 0    | 0    | 0    | 0    | 0    | 0    | 0    | 0    | 1    | 1    | 0    |
| A→V | 2     | 0    | 0    | 0    | 0    | 1    | 0    | 0    | 0    | 1    | 0    | 0    | 0    |
| C→R | 2     | 0    | 1    | 0    | 0    | 0    | 0    | 0    | 1    | 0    | 0    | 0    | 0    |
| D→S | 2     | 0    | 0    | 0    | 0    | 0    | 0    | 0    | 0    | 2    | 0    | 0    | 0    |
| G→R | 1     | 0    | 0    | 0    | 0    | 0    | 0    | 1    | 0    | 0    | 0    | 0    | 0    |
| G→S | 2     | 0    | 1    | 0    | 0    | 0    | 0    | 0    | 0    | 0    | 1    | 0    | 0    |
| H→C | 2     | 0    | 0    | 0    | 0    | 0    | 0    | 0    | 0    | 1    | 0    | 1    | 0    |
| I→L | 2     | 0    | 0    | 0    | 0    | 0    | 0    | 0    | 0    | 2    | 0    | 0    | 0    |
| K→A | 2     | 0    | 0    | 0    | 0    | 0    | 0    | 0    | 1    | 1    | 0    | 0    | 0    |
| K→G | 2     | 0    | 0    | 0    | 0    | 0    | 0    | 0    | 0    | 1    | 0    | 0    | 1    |
| K→N | 2     | 0    | 0    | 0    | 0    | 2    | 0    | 0    | 0    | 0    | 0    | 0    | 0    |
| L→P | 2     | 0    | 0    | 0    | 1    | 0    | 0    | 0    | 1    | 0    | 0    | 0    | 0    |
| Q→R | 2     | 0    | 1    | 0    | 0    | 0    | 0    | 0    | 0    | 0    | 0    | 1    | 0    |
| S→A | 2     | 0    | 0    | 1    | 1    | 0    | 0    | 0    | 0    | 0    | 0    | 0    | 0    |
| S→N | 2     | 0    | 0    | 0    | 0    | 0    | 0    | 0    | 0    | 0    | 0    | 1    | 1    |
| V→M | 2     | 0    | 0    | 0    | 0    | 0    | 0    | 0    | 1    | 0    | 0    | 1    | 0    |
| Y→H | 1     | 0    | 0    | 0    | 0    | 0    | 0    | 1    | 0    | 0    | 0    | 0    | 0    |
| *→W | 1     | 0    | 0    | 0    | 0    | 0    | 0    | 0    | 1    | 0    | 0    | 0    | 0    |
| C→P | 1     | 0    | 0    | 0    | 0    | 0    | 0    | 0    | 1    | 0    | 0    | 0    | 0    |
| D→A | 1     | 0    | 0    | 0    | 0    | 0    | 0    | 0    | 0    | 1    | 0    | 0    | 0    |
| D→H | 1     | 0    | 0    | 0    | 0    | 0    | 0    | 0    | 0    | 1    | 0    | 0    | 0    |
| D→G | 1     | 0    | 0    | 0    | 0    | 0    | 0    | 0    | 0    | 0    | 1    | 0    | 0    |
| F→P | 1     | 0    | 0    | 0    | 0    | 0    | 0    | 1    | 0    | 0    | 0    | 0    | 0    |
| K→T | 1     | 0    | 0    | 0    | 0    | 0    | 0    | 0    | 0    | 0    | 0    | 0    | 1    |
| L→R | 0     | 0    | 0    | 0    | 0    | 0    | 0    | 0    | 0    | 0    | 0    | 0    | 0    |
| M→A | 1     | 0    | 0    | 0    | 0    | 0    | 0    | 0    | 0    | 1    | 0    | 0    | 0    |
| M→T | 1     | 0    | 0    | 0    | 0    | 0    | 0    | 0    | 0    | 1    | 0    | 0    | 0    |
| N→V | 1     | 0    | 0    | 0    | 0    | 0    | 0    | 0    | 0    | 0    | 1    | 0    | 0    |
| R→E | 1     | 0    | 0    | 0    | 0    | 0    | 0    | 0    | 0    | 1    | 0    | 0    | 0    |
| R→T | 1     | 0    | 0    | 0    | 0    | 0    | 0    | 1    | 0    | 0    | 0    | 0    | 0    |
| S→D | 1     | 0    | 1    | 0    | 0    | 0    | 0    | 0    | 0    | 0    | 0    | 0    | 0    |
| V→L | 1     | 0    | 0    | 0    | 0    | 0    | 0    | 0    | 1    | 0    | 0    | 0    | 0    |
| V→T | 1     | 0    | 0    | 0    | 0    | 0    | 0    | 0    | 1    | 0    | 0    | 0    | 0    |
| W→R | 1     | 0    | 0    | 0    | 0    | 0    | 0    | 0    | 0    | 0    | 0    | 0    | 1    |
| *→S | 1     | 0    | 0    | 0    | 0    | 0    | 0    | 1    | 0    | 0    | 0    | 0    | 0    |

**Table S3. Comparison of RNA editing types and frequency of plastid-encoded genes among available dinoflagellates.**

| Gene        | Dinoflagellates                  |           |                      |           |                                  |           | shared edit sites*   |           |                      |           |                                                     |
|-------------|----------------------------------|-----------|----------------------|-----------|----------------------------------|-----------|----------------------|-----------|----------------------|-----------|-----------------------------------------------------|
|             | Smi                              |           | Htr                  |           | Cho                              |           |                      | Kve       |                      | Lpo       |                                                     |
|             | edit types                       | no. edits | edit types           | no. edits | edit types                       | no. edits | edit types           | no. edits | edit types           | no. edits |                                                     |
| <i>psaA</i> | A/G, G/A<br>C/U, U/C<br>G/C, A/C | 100/2022  | A/G<br>U/C<br>A/U    | 4//2196   | A/G, G/A<br>C/U, U/C<br>G/C, A/C | 104/1329  | A/G, G/A<br>U/C      | 34/1227   | nd                   |           | Smi&Htr: 1/670<br>Smi&Cho: 20/443<br>Smi&Kve: 5/380 |
| <i>psbB</i> | A/G, G/A<br>C/U, U/C             | 30/1500   | none                 | 0         | A/G, G/A<br>C/U, U/C<br>G/C, A/C | 86/1560   | nd                   |           | nd                   |           | Smi&Cho: 10/438                                     |
| <i>psbE</i> | A/G, C/U<br>G/C, A/C<br>U/G      | 9/234     | A/G<br>G/C           | 2/231     | A/G, G/A<br>C/U, U/C<br>G/C      | 13/221    | nd                   |           | nd                   |           | Smi&Cho: 2/70<br>Smi&Htr: 0                         |
| <i>psbC</i> | A/G, G/A<br>C/U, U/C<br>G/C, A/C | 25/1359   | A/G<br>G/C           | 4/1380    | nd                               |           | A/G, G/A<br>C/U, U/C | 25/904    | nd                   |           | Smi&Kve: 4/307<br>Smi&Htr: 0                        |
| <i>petD</i> | A/G, G/A<br>C/U, U/C<br>G/C, A/C | 33/477    | A/G, U/C<br>G/C      | 5/474     | nd                               |           | A/G, G/A<br>U/C      | 6/174     | nd                   |           | Smi&Kve: 2/45<br>Smi&Htr: 1/158                     |
| <i>petB</i> | A/G, G/A<br>C/U, U/C<br>G/C      | 23/657    | U/C                  | 1/657     | nd                               |           | nd                   |           | A/G, G/A<br>C/U, U/C | 15/657    | Smi&Gpo: 3/219<br>Smi&Htr: 0                        |
| <i>psbA</i> | A/G<br>G/C                       | 3/1029    | none                 | 0         | nd                               |           | nd                   |           | A/G, C/U<br>G/C      | 10/1035   | Smi&Gpo: 2/342                                      |
| <i>psbD</i> | A/G, C/U<br>G/C, U/G             | 8/1074    | U/C                  | 2/1071    | nd                               |           | nd                   |           | nd                   |           | Smi&Htr: 0                                          |
| <i>atpA</i> | A/G, G/A<br>C/U, U/C<br>G/C      | 43/1434   | A/G, U/C<br>A/C      | 6/1437    | nd                               |           | nd                   |           | nd                   |           | Smi&Htr: 4/478                                      |
| <i>16S</i>  | A/G, C/U                         | 22/794    | A/G, G/A<br>U/A      | 39/1514   | A/G, C/U<br>U/C, U/G             | 35/976    | nd                   |           | A/G, G/A<br>C/U, U/G | 19/1159   |                                                     |
| <i>23S</i>  | A/G, C/U<br>G/C, G/U             | 36/1138   | A/G, G/A<br>U/A, A/U | 22/675    | nd                               |           | nd                   |           | nd                   |           |                                                     |

Smi, *Symbiodinium minutum*; Htr, *Heterocapsa triquetra*; Cho, *Ceratium horridum*; Kve, *Karlodinium veneficum*; Lpo, *Lingulodinium polyedra*

Note: 16S rRNA of dinoflagellates are quite diverged, difficult to locate comparable edited sites.

Comparison of edited sites between Smi and Htr was from the full coding sequence.

\* Number of shared edited site that cause amino acid substitution in a comparable region

nd=data was not determined

**TableS4. Number of editing site found on predicted secondary structure of plastid-encoded genes of *Symbiodinium minutum*.**

| Gene        | Structures |       |        | Unpredicted sites | Total edited sites |
|-------------|------------|-------|--------|-------------------|--------------------|
|             | helix      | sheet | others |                   |                    |
| <i>psbA</i> | 2          | 0     | 1      | 0                 | 3                  |
| <i>psbB</i> | 20         | 1     | 7      | 0                 | 28                 |
| <i>psbC</i> | 17         | 0     | 4      | 1                 | 22                 |
| <i>psbD</i> | 2          | 0     | 3      | 2                 | 7                  |
| <i>psbE</i> | 4          | 0     | 4      | 0                 | 8                  |
| <i>petB</i> | 14         | 0     | 8      | 0                 | 22                 |
| <i>petD</i> | 20         | 0     | 8      | 0                 | 28                 |
| <i>psaA</i> | 50         | 2     | 32     | 0                 | 84                 |
| <i>psaB</i> | 47         | 2     | 29     | 0                 | 78                 |
| <i>atpA</i> | 12         | 6     | 15     | 4                 | 37                 |
| <i>atpB</i> | 3          | 4     | 11     | 26                | 44                 |
| sum         | 191        | 15    | 122    | 33                | 361                |

**Table S5. Changes of molecular weight and GRAVY by RNA editing of *Symbiodinium minutum* plastid-encoded genes.**

| Gene         | MW before editing | MW after editing | MW change (%) | Gravy before editing | Gravy after editing | Gravy change (%) |
|--------------|-------------------|------------------|---------------|----------------------|---------------------|------------------|
| <i>psbA</i>  | 37628.4           | 37646.4          | 0.05          | 0.533                | 0.525               | -1.50            |
| <i>psbB</i>  | 56017.5           | 55927.3          | -0.16         | 0.25                 | 0.243               | -2.80            |
| <i>psbC</i>  | 50455             | 50073.6          | -0.76         | 0.224                | 0.27                | 20.54            |
| <i>psbD</i>  | 40162.5           | 40086.4          | -0.19         | 0.454                | 0.427               | -5.95            |
| <i>psbE</i>  | 8774              | 8753.9           | -0.23         | 0.27                 | 0.294               | 8.89             |
| <i>psbI</i>  | 3716.3            | 3712.3           | -0.11         | 1.097                | 1.054               | -3.92            |
| <i>petB*</i> | 24039.5           | 24074.4          | 0.15          | 0.813                | 0.729               | -10.33           |
| <i>petD*</i> | 17112.9           | 16985.4          | -0.75         | 1.188                | 0.975               | -17.93           |
| <i>psaA</i>  | 75986.9           | 74723.3          | -1.66         | 0.266                | 0.397               | 49.25            |
| <i>psaB</i>  | 78679.1           | 77894.5          | -1.00         | 0.229                | 0.33                | 44.10            |
| <i>atpA</i>  | 51625.9           | 51052.1          | -1.11         | 0.452                | 0.486               | 7.52             |
| <i>atpB</i>  | 73594.7           | 72688.6          | -1.23         | 0.109                | 0.148               | 35.78            |

\*stop codon gives no MW and GRAVY score
